1 A novel experimental system reveals immunoregulatory responses as mediators of  
2 persistent orthohantavirus infections in a rodent reservoir host

3  
4 Tomas Strandin<sup>1</sup>, Teemu Smura<sup>1</sup>, Paula Ahola<sup>1</sup>, Kirsi Aaltonen<sup>1,2</sup>, Tarja Sironen<sup>1,2</sup>, Jussi  
5 Hepojoki<sup>1,3</sup>, Isabella Eckerle<sup>4</sup>, Rainer G. Ulrich<sup>5</sup>, Olli Vapalahti<sup>1,2</sup>, Anja Kipar<sup>2,3</sup>, Kristian M.  
6 Forbes<sup>6</sup>

7

8 1) Zoonosis Unit, Department of Virology, Medicum, University of Helsinki, Helsinki, Finland

9 2) Department of Basic Veterinary Sciences, Faculty of Veterinary Medicine, University of  
10 Helsinki, Helsinki, Finland

11 3) Laboratory for Animal Model Pathology, Institute of Veterinary Pathology, Vetsuisse  
12 Faculty, University of Zurich, Zurich, Switzerland

13 4) Institute of Virology, University of Bonn Medical Centre, Bonn, Germany and present  
14 address: Geneva Centre for Emerging Viral Diseases, University Hospital of Geneva &  
15 Department of Microbiology and Molecular Medicine, University of Geneva, Geneva,  
16 Switzerland

17 5) Institute of Novel and Emerging Infectious Diseases, Friedrich-Loeffler-Institut, Federal  
18 Research Institute for Animal Health, Greifswald-Insel Riems, Germany

19 6) Department of Biological Sciences, University of Arkansas, Fayetteville, USA

20 Word count: abstract 250, text 6019

21 Corresponding author

22 Tomas Strandin

23 tomas.strandin@helsinki.fi

24 Running title: Persistence of Puumala orthohantavirus in bank voles

25 Keywords: immunity, Puumala orthohantavirus, rodent reservoir, spillover, vole, zoonoses

## 26 Abstract

27 Orthohantaviruses are globally emerging zoonotic pathogens. Human infections are characterized  
28 by an overt immune response that is efficient at counteracting virus replication but can also cause  
29 severe tissue damage. In contrast, orthohantavirus infections in rodent reservoir hosts are persistent  
30 and asymptomatic. The mechanisms facilitating asymptomatic virus persistence in reservoir hosts  
31 are not well understood but could help to guide therapeutic strategies for human infections. Here we  
32 report on a study using *in vivo* and *in vitro* experiments to investigate immune responses associated  
33 with persistent Puumala orthohantavirus (PUUV) infections in the bank vole (*Myodes glareolus*), its  
34 reservoir host. We examined adaptive cellular and humoral responses by quantifying changes in T-  
35 cell related gene expression in the spleen and immunoglobulin (Ig) responses in blood, respectively.  
36 Since existing Vero E6-cell adapted hantavirus isolates have been demonstrated to have lost their  
37 wild-type infection characteristics, infections were conducted with a novel PUUV strain isolated on  
38 a bank vole cell line. Whole virus genome sequencing revealed that only minor sequence changes  
39 occurred during the isolation process, and critically, experimental infections of bank voles with the  
40 new isolate resembled natural infections. *In vitro* infection of bank vole splenocytes with the novel  
41 isolate demonstrated that PUUV promotes immunoregulatory responses by inducing interleukin-10,  
42 a cytokine strongly associated with chronic viral infections. A delayed virus-specific humoral  
43 response occurred in experimentally infected bank voles, which is likely to allow for initial virus  
44 replication and the establishment of persistent infections. These results suggest that host  
45 immunoregulation facilitates persistent orthohantavirus infections in reservoir hosts.

46

## 47 Importance

48 Orthohantaviruses are a group of global pathogens that regularly spillover from rodent reservoirs  
49 into humans and can cause severe disease. Conversely, infections in reservoir hosts do not cause  
50 obvious adverse effects. The mechanisms responsible for persistent asymptomatic reservoir

51 infections are unknown, and progress has been hindered by the absence of an adequate experimental  
52 system. Knowledge on these mechanisms could help provide strategies to treat human infections.  
53 We developed and validated an experimental system based on an orthohantavirus isolated in cells of  
54 its vole reservoir host. Using animal and cell culture experiments in the reservoir host system, we  
55 demonstrated that infection suppresses immunity in the vole reservoir via specific mechanisms,  
56 likely allowing the virus to take hold and preventing immune responses that can cause self-damage.

57

## 58 Introduction

59 Understanding how zoonotic pathogens are maintained and transmitted in nature is critical for  
60 efforts to curtail human disease (1). Most investigations have focused on the identification of  
61 wildlife reservoir hosts (2, 3), and to a lesser extent, the characterization of high-risk subgroups and  
62 time periods, such as migration and breeding periods (4, 5), when transmission is greatest in  
63 reservoir host populations and the risk of human exposure may therefore be elevated. However, it  
64 remains largely unknown how zoonotic pathogens are maintained at an individual-level in wildlife  
65 reservoirs, such as the molecular and cellular mechanisms of host-pathogen interactions that  
66 promote clearance or persistence, and feed back onto these population-level dynamics.

67

68 Hantaviruses (genus *Orthohantavirus*, order *Bunyavirales*) provide one of the most clearly  
69 described reservoir host-zoonotic pathogen relationships (6). Hantavirus species have been  
70 identified across the globe, some of which cause Hemorrhagic Fever with Renal Syndrome (HFRS)  
71 in Eurasia or Hantavirus Cardiopulmonary Syndrome (HCPS) in the Americas (7). These diseases  
72 begin abruptly with a general febrile phase followed by signs of vascular leakage, predominantly  
73 manifesting as transient kidney failure in HFRS or as life-threatening pulmonary complications in  
74 HCPS (7, 8). The pathogenesis of both conditions is immune-mediated, with pronounced activation  
75 of immune cells and pro-inflammatory cytokines during acute stages of disease. An intense

76 hantavirus-directed immune response then results in efficient virus clearance in surviving patients  
77 (8).

78

79 In contrast to human infection, hantavirus infections are thought to be persistent and asymptomatic  
80 in their wildlife reservoirs (6). Each hantavirus species is carried by a specific reservoir host; for  
81 example, Puumala orthohantavirus (PUUV), which is present in Europe and causes thousands of  
82 human infections annually (9), is carried by the bank vole (*Myodes glareolus*). Based on  
83 mitochondrial cytochrome *b* gene sequences different evolutionary lineages of the bank vole with  
84 different glacial refugia were defined (10-13). In southern to central Finland the Eastern  
85 evolutionary lineage has been identified (13).

86

87 Persistent infections are generally facilitated by host immune tolerance (14), and it has been  
88 suggested that activation of regulatory T cells in reservoir hosts could also play a role in enabling  
89 hantavirus persistence (15, 16). Deciphering the detailed molecular mechanisms by which reservoir  
90 hosts become immune tolerant instead of attempting potentially costly virus clearance could  
91 significantly increase our understanding of hantavirus pathogenesis and provide insights into  
92 alternative treatment strategies.

93

94 A major issue hindering detailed research on the molecular mechanisms of hantavirus persistence in  
95 reservoir hosts has been the absence of a standardized experimental infection system. Two main  
96 experimental strategies have been employed by researchers to date: 1) lung homogenates from  
97 naturally infected rodent hosts have been used as virus inoculum. However, this method suffers  
98 from slowly developing infections and a lack of standardized infection loads (17, 18), and 2)  
99 hantaviruses isolated and grown to high titers in cell culture. However, this method has been

100 performed so far almost exclusively using Vero E6 cells, which generates cell culture-adapted  
101 viruses with attenuated properties (19-22).

102

103 The purposes of this study are to develop an effective hantavirus experimental wildlife system and  
104 to examine the immunologic responses that facilitate persistent hantavirus infections in a reservoir  
105 host species. To these means we employed PUUV and its reservoir host, the bank vole. Our first  
106 goal was to isolate PUUV from wild bank voles using a host-derived cell line, and to evaluate  
107 genotypic changes during the isolation process using next-generation sequencing (NGS).

108 Experimental bank vole infections were then used to compare the viral RNA load and tissue  
109 distribution and) of the novel isolate to the wild bank vole-derived PUUV-containing lung  
110 homogenate (PUUV-wt), a Vero E6-cell attenuated PUUV-Kazan strain and to PUUV in naturally  
111 infected wild voles.

112

113 To examine immunologic responses to PUUV in vole reservoir hosts, we measured T helper cell  
114 differentiation pathways by assaying changes in mRNA expression of cytokines and transcription  
115 factors (TF) related to T helper (Th) 1-, Th2- and regulatory T (Treg) cell activation. Comparisons  
116 were made among voles infected with the novel PUUV isolate, PUUV-Kazan, PUUV-wt and mock  
117 infected voles. Since no assays to detect PUUV-specific T cell responses are available for bank  
118 voles, the bulk expression levels of T cell-related mRNAs in the spleen were studied both directly  
119 in spleens of experimentally infected voles and using single-cell suspensions (splenocytes) from  
120 PUUV-negative bank voles after *in vitro* infection with PUUV isolates. To gain further insights into  
121 PUUV-specific and non-specific humoral responses to PUUV infections, we additionally measured  
122 PUUV nucleocapsid (N)-specific and total immunoglobulin G (IgG) levels in vole blood following  
123 infection.

124

## 125 Results

126

### 127 *Isolation of PUUV-Suo in epithelial bank vole cells*

128 A renal epithelial cell line Mygla.REC.B of the Western evolutionary lineage of the bank vole was  
129 generated to isolate a new PUUV strain named Suonenjoki (PUUV-Suo) from the lungs of a  
130 PUUV-infected wild bank vole collected in Suonenjoki, Finland. Based on the detection of PUUV  
131 N protein by immunofluorescence assay (Fig. 1), 100% of cells were infected after approximately  
132 20 cell passages post initial inoculation with the PUUV-containing lung homogenate. Cell  
133 passaging did not influence virus infectivity, as confirmed by consistent detection of progeny  
134 viruses in cell culture supernatants at  $10^4$  fluorescence focus forming units (FFUs)/ml.

135

136 The isolation process resulted in eight nucleotide exchanges when compared to the consensus  
137 sequence derived from the lung homogenate (Table 1). Two mutations occurred in non-  
138 coding regions, three resulted in amino acid exchanges in the RNA-dependent RNA polymerase  
139 (RdRP, L segment), one resulted in an amino acid exchange in the N protein, and two were silent  
140 mutations in the glycoprotein precursor (GPC; M segment) and RdRP coding regions. The new  
141 virus isolate had a 95-99 % nucleotide sequence identity with partially sequenced PUUV strains  
142 from bank voles in Konnevesi and from a fatal human case in Pieksämäki (Supplementary Figs 1-3)  
143 (23, 24), both located within 100 km of the vole trapping site in central Finland.

144

145

### 146 *Replication of PUUV-Suo in Mygla.REC.B cells is resistant to immune stimulation*

147 We hypothesized that the observed persistence of PUUV-Suo in bank vole cells would be a  
148 consequence of either impaired host cell antiviral signaling or the ability of the virus to counteract  
149 antiviral responses. Therefore, the antiviral function of Mygla.REC.B cells was assessed by relative  
150 reverse transcription-real time quantitative polymerase chain reaction (RT-qPCR) quantification of

151 the interferon-inducible myxovirus resistance protein 2 (Mx2) mRNA after exogenous activation of  
152 non-infected and infected cells with the toll-like receptor 3 (TLR3) agonist polyI:C or with Sendai  
153 virus (SeV, also known as Murine respirovirus). Firstly, supporting the immune competence of  
154 MyglA.REC.B cells, a significant upregulation of Mx2 mRNA occurred in non-infected cells with  
155 both stimulants (~100-fold and 2000-fold by polyI:C and Sendai virus, respectively, Fig. 2A).  
156 Secondly, non- and polyI:C-stimulated PUUV-infected cells showed higher levels of Mx2 mRNA  
157 than non-infected cells. PUUV and Sendai virus superinfection had a significant synergistic effect  
158 on Mx2 mRNA production (Fig. 2A). These findings suggest that MyglA.REC.B cells are capable  
159 of interferon signaling but that persistent PUUV-Suo infection does not impair this pathway.

160

161 We also investigated whether PUUV replication in MyglA.REC.B cells is susceptible to an  
162 exogenously induced antiviral state. PUUV-infected cells, non-stimulated or stimulated with  
163 polyI:C or Sendai virus, were assessed for PUUV S segment RNA levels by RT-qPCR at 1 and 3  
164 days (d) post-stimulation. Neither polyI:C nor Sendai virus stimulation influenced PUUV S  
165 segment RNA levels, which increased significantly from days 1 to 3 with and without stimulation  
166 (Fig. 2B), indicating that PUUV-Suo infection in MyglA.REC.B cells is not affected by innate  
167 immune pathway stimulation.

168

#### 169 *Experimental PUUV-Suo infection resembles natural infection in bank voles*

170 Following experimental infection of bank voles with PUUV-Suo or a mock inoculum (PBS), the  
171 amount of PUUV S segment RNA was measured in lungs, spleen, kidney and blood of voles at 3d,  
172 and 1, 2 and 5 weeks (wks) post infection (pi). Viral RNA was similarly measured in the urine of  
173 experimentally infected voles at 3d, and 1 and 2wks pi. As another control, virus RNA load and  
174 RNA distribution in tissues were also assessed at 2 and 5wks pi from voles inoculated with UV-  
175 inactivated PUUV-Suo isolate.

176

177 PUUV RNA was detected in all organs of PUUV-Suo infected voles from 3 dpi onwards (Fig. 3A),  
178 but not in mock-infected animals nor those inoculated with UV-inactivated virus (data not shown).  
179 Highest PUUV RNA levels occurred in the lungs at 3d and 1wk pi and decreased thereafter, with  
180 increased levels then observed in the spleen (at 2 and 5wk pi) and kidneys (at 5wk pi). PUUV RNA  
181 was detected in the blood of one vole at 3 dpi, suggesting that if PUUV-Suo caused viremia it  
182 occurred very early during infection. We also detected PUUV RNA in the urine of all tested PUUV-  
183 Suo infected bank voles (n = 7), suggesting virus shedding.

184

185 We further compared the infection dynamics of the PUUV-Suo isolate to a Vero E6 cell-adapted  
186 PUUV-Kazan isolate, PUUV-wt and to natural PUUV infections. Low levels of PUUV RNA were  
187 detected following infection with PUUV-Kazan, mainly in the lungs of infected voles at 3d pi; after  
188 this the virus was efficiently cleared, with viral RNA levels significantly decreased at 1wk pi (Fig.  
189 3B). No virus replication was observed for PUUV-wt at 2wk pi, but three out of four voles were  
190 positive at 5wk pi (Fig. 3C). At this time point, viral RNA loads were highest in the lungs, followed  
191 by the spleen and kidneys. The amount and distribution of PUUV RNA seen in naturally PUUV-  
192 infected wild bank voles (with unknown infection timepoint) resembled that seen in PUUV-Suo  
193 infected voles during the first week and in voles inoculated with PUUV-wt at 5wk pi (Fig. 3D).

194

#### 195 *PUUV-Suo host cell range resembles natural infections*

196 Both naturally and experimentally infected bank voles were examined by histology and  
197 immunohistology for PUUV N protein. The two naturally infected voles did not exhibit any  
198 histopathological changes and viral antigen expression was limited in its amount and distribution.  
199 Besides endothelial cells in renal glomerula and in some capillaries of the liver, kidney, lungs and  
200 heart (Fig. 4A, B), pneumocytes (mainly type II) and macrophages in liver (Kupffer cells) and



201 spleen (red pulp macrophages) were found to be occasionally positive (Fig. 4B). In one animal with  
202 a higher number of positive cells, viral antigen was also detected in tubular epithelial cells in the  
203 renal cortex and medulla.

204

205 None of the experimentally PUUV-Suo infected voles exhibited histopathological changes (two  
206 voles analyzed at each time point). During the early stages of infection ( $\leq 1$  wk pi), the infection  
207 pattern was similar to that seen in naturally infected bank voles. Capillary endothelial cells (also in  
208 glomerular tufts), pneumocytes and macrophages (Kupffer cells in the liver, pulmonary alveolar  
209 macrophages) occasionally exhibited viral antigen expression (Fig. 4C, D). At later time points (2  
210 and 5wks pi), viral antigen was only found in macrophages, and almost exclusively in rare  
211 macrophages of the splenic red pulp (Fig 4E). No PUUV N protein was detected in PUUV-Kazan-  
212 infected voles, consistent with the low level of PUUV RNA in those animals (Fig. 3C).

213

214 Histological examination of the PUUV-wt infected voles at 5wks pi did not reveal any pathological  
215 changes. Interestingly, when testing lungs, kidneys and spleen by immunohistochemistry, N protein  
216 expression was only detected in one of three animals, and only in the lungs, where a few individual  
217 pneumocytes and endothelial cells were positive (Fig. 4F). This animal also showed the highest  
218 viral RNA levels in the lungs.

219

220 *PUUV-specific immunoglobulin (Ig) responses are delayed during persistent infections*

221 All PUUV-Suo and PUUV-Kazan infected voles, which were infected for at least one week,  
222 seroconverted to produce PUUV-specific Ig but with contrasting kinetics (Fig. 5A; the assay does  
223 not discriminate between Ig-subclasses). For PUUV-Suo, specific Ig-titers were low at 1wk but  
224 peaked at 2wks pi. This was significantly different from PUUV-Kazan infected voles, in which

225 highest PUUV-specific Ig titers were detected at 1wk pi. For PUUV-wt, only one of three infected  
226 voles had seroconverted at 3 wks pi (Fig. 5A).

227

228 Next we measured total IgG levels in the blood of experimentally infected voles. Compared to  
229 mock-infected animals at 2wks pi, voles infected with PUUV-Suo showed elevated total IgG levels,  
230 while no difference was observed between voles infected with the PUUV-Kazan or the mock  
231 inoculate at 1wk and 2wks pi (Fig. 5B). The two PUUV-wt infected voles analyzed had elevated  
232 total IgG levels when compared to mock-infected voles (Fig. 5B), despite only one showing a  
233 PUUV-specific response (Fig. 5A).

234

235 To gain further insights into whether total IgG levels were comprised predominantly of PUUV-  
236 specific responses in experimentally infected voles, PUUV-specific Ig and total IgG titers were  
237 assessed also in naturally PUUV-infected voles. Despite detecting PUUV-specific responses at  
238 levels comparable to experimentally PUUV-Suo infected voles, total IgG in naturally infected voles  
239 was not elevated when compared to non-infected voles (Fig. 5C), suggesting that the acute total IgG  
240 response towards PUUV-Suo infection involves PUUV non-specific IgG.

241

#### 242 *Minor effects of PUUV infection on splenic T cell related gene expression*

243 To assess the potential effects of experimental PUUV infection on T cell differentiation, we assayed  
244 pre-selected splenic T cell related mRNAs in mock-, PUUV-Suo and PUUV-wt infected voles for  
245 transcriptional regulation (the same animals as those examined by PUUV-specific RT-PCR in Fig.  
246 3). Transcription levels of cytokines associated with Th1, Th2 or Treg cell activation (interferon  
247 {IFN}- $\gamma$ , interleukin {IL}-4, IL-10 or transforming growth factor {TGF}- $\beta$ ) did not differ  
248 significantly between PUUV- and mock-infected voles (Fig. 6). Of key transcription factors for  
249 Th1, Th2 and Treg pathways (Tbet, Gata binding protein 3 {Gata3} or Forkhead box P3 {FoxP3},

250 respectively), FoxP3 expression was significantly lower in PUUV-wt infected than in mock-  
251 infected voles at 5 wks dpi. A similar trend, although not statistically significant, was observed for  
252 PUUV-Suo at 2 and 5 wks dpi. Another significant change in immune gene regulation was  
253 represented by the upregulation of Mx2 gene expression in response to PUUV-Suo infection in  
254 comparison to mock infection at 5wks pi (Fig. 6B). A trend towards higher Mx2 mRNA levels in  
255 response to PUUV-wt was also observed at the same time point (Fig. 6C).

256

### 257 *PUUV-Suo promotes immunoregulation via cytokine IL-10*

258 Splenocytes isolated from PUUV-negative wild-caught bank voles were inoculated *in vitro* with  
259 PUUV-Suo, PUUV-Kazan and UV-inactivated PUUV-Suo and assessed for changes in T cell-  
260 related gene expression. IFN- $\gamma$  mRNA levels were higher in PUUV-Kazan infected splenocytes  
261 than in PUUV-Suo infected splenocytes (~11-fold vs. ~3-fold increase in comparison to non-  
262 infected controls, respectively; Fig. 7). In contrast, IL-10 mRNA expression was significantly  
263 upregulated in response to PUUV-Suo when compared to PUUV-Kazan and UV-inactivated  
264 PUUV-Suo (~6-fold vs. 2-3-fold increase in comparison to non-infected controls, respectively). No  
265 other significant differences in transcription levels of other genes (TGF- $\beta$ , Mx2, T-bet, Gata3) were  
266 observed. However, we were unable to measure IL-4 and FoxP3 mRNA, likely due to the generally  
267 lower RNA levels in single-cell suspensions than in tissue samples. The PUUV-specific RT-PCR  
268 confirmed that live viruses (PUUV-Suo and Kazan), but not UV-inactivated viruses replicated in  
269 bank vole splenocytes at a comparable level; however the level of infection varied significantly  
270 among splenocyte donors (data not shown).

271

## 272 Discussion

273 In this study we established and validated an experimental hantavirus rodent reservoir model. Using  
274 a virus newly isolated on a bank vole cell line, we conducted standardized experimental *in vivo* and

275 *in vitro* infections to examine immune responses at cellular and organismic levels, gaining insight  
276 into the mechanisms of PUUV persistence in the reservoir host. These experiments revealed that  
277 activation of the immunoregulatory cytokine IL-10 differentiates wild-type PUUV from attenuated  
278 isolates, which is likely to be a key factor in hantavirus persistence. Experimentally infected voles  
279 also exhibited a delayed PUUV-specific humoral response, suggesting that PUUV has developed  
280 mechanisms to evade host immune recognition.

281

282 The isolation of hantaviruses in cell culture is rare and has so far typically been achieved using  
283 interferon type 1-deficient cells (Vero E6 cells) derived from African green monkeys (25), which  
284 result in attenuated wild-type properties of the virus (19-22). The PUUV-Suo strain is the first  
285 hantavirus isolated on a cell line of the respective natural reservoir host. The isolation process of  
286 PUUV-Suo in bank vole renal epithelial cells resulted in a significantly lower nucleotide  
287 substitution frequency (0.06 %) when compared to a PUUV-Kazan strain on Vero E6 cells (21, 26)  
288 and persistent cell culture infections that were refractory to exogenous stimulation of innate  
289 immune pathways. Importantly, the PUUV-Suo isolate caused persistent vole infections without  
290 obvious pathological effects. Target cell patterns and viral RNA loads, particularly during the early  
291 stages of infection, were consistent with those seen in naturally infected voles and were  
292 considerably different from experimental infections conducted with the attenuated PUUV-Kazan  
293 isolate. The MyGla.REC.B cell line used to isolate PUUV-Suo is derived from the Western  
294 evolutionary lineage, which is different from the Eastern bank vole lineage present in central  
295 Finland (27) and used as the source and target of PUUV-Suo isolate. The efficient replication of the  
296 Eastern bank vole lineage-derived PUUV-Suo strain in Western lineage bank vole-derived cell line  
297 is in line with results from a field study in Germany demonstrating transmission of Western lineage-  
298 associated PUUV to sympatrically occurring bank voles of the Eastern and Carpathian lineages  
299 (28). Further *in vitro* studies are needed to determine whether heterologous bank voles evolutionary

300 lineages could support PUUV isolation and/or infection. These future investigations may profit  
301 from the recent establishment of permanent bank vole cell lines from different evolutionary lineages  
302 of the bank vole (29).

303

304 The viral target cell pattern observed for PUUV-Suo is similar to, but less widespread than in  
305 weanling and suckling bank voles that were inoculated with lung homogenates from PUUV-positive  
306 bank voles (17). Experimental infections conducted with Sin Nombre orthohantavirus (SNV) in  
307 deer mice yielded comparable, though apparently more intense viral antigen expression (18). In  
308 naturally infected deer mice, however, only pulmonary and cardiac vascular endothelial cells were  
309 found to be positive, with an expression intensity that resembled that observed in the present study  
310 (30). Interestingly, only PUUV-Suo appears to infect renal tubular epithelial cells, which would  
311 account for more intense virus shedding in urine. This could reflect different primary transmission  
312 routes for PUUV and SNV, with PUUV suggested to be shed more in urine and SNV in the saliva  
313 (6).

314

315 In support of the ability of PUUV to evade T cell immune responses, we detected no significant  
316 upregulation in mRNA expression (including transcription factors Tbet, Gata3, FoxP3 and  
317 cytokines IFN- $\gamma$ , IL-4, IL-10 and TGF- $\beta$ ) in the spleens of bank voles infected with PUUV-Suo or  
318 wild PUUV-containing lung homogenates (PUUV-wt). Instead, a decrease in FoxP3 levels in  
319 PUUV-wt infected voles is contrary to the suggested role of the Tregs in mediating virus  
320 persistence, as detected in other experimental hantavirus-reservoir host interactions (31, 32). These  
321 discrepant results could be explained by differences in experimental setups. While we measured  
322 bulk FoxP3 mRNA levels in the spleen, others have looked either at splenic antigen-specific (31) or  
323 lung-resident (32) Treg responses. It is possible that the decrease in FoxP3 mRNA and associated  
324 Treg levels in the spleen reflects the recruitment of these cells into peripheral sites of infection in

325 our experimental setup. However, inherent differences in the persistence mechanisms among PUUV  
326 and other hantaviruses cannot be ruled out and needs to be further evaluated.

327

328 An interesting finding was that PUUV-Suo induced IL-10 mRNA expression in bank vole  
329 splenocyte cultures. This was not observed with attenuated PUUV-Kazan, which instead induced  
330 IFN- $\gamma$ . IL-10 is well-known for its ability to hinder pro-inflammatory responses (33) and could  
331 explain the lack of IFN- $\gamma$  induction in PUUV-Suo infected splenocytes. The fact that we did not  
332 observe elevated IL-10 mRNA levels in the spleen of PUUV-Suo (or PUUV-wt) infected voles  
333 could be explained by a higher multiplicity of infection (m.o.i.) achieved in an *in vitro* environment  
334 using cultured splenocytes. It is also possible that a potential increase in IL-10 transcription does  
335 occur in the spleen of infected voles, but is short-lived and thus difficult to observe using samples  
336 collected with several day intervals.

337

338 The increase in IL-10 expression due to PUUV in bank vole splenocytes is not surprising given the  
339 established role of this cytokine in promoting chronic infections (34, 35). Lymphocytic  
340 choriomeningitis virus (LCMV) infection in mice is the best-studied non-human model for  
341 persistent virus infections. For this mammarenavirus, IL-10 blocking experiments have been shown  
342 to lead to virus clearance, demonstrating the key role of IL-10 in driving persistent infections (36-  
343 38). The immunomodulatory effects of IL-10 are exerted through antigen presenting cells (APCs)  
344 which, in response to IL-10, inhibit effector Th1 cell function and downregulate inflammation (33).  
345 Our results demonstrating early induction of IL-10 in PUUV-infected splenocytes together with  
346 findings of virus-infected macrophages *in vivo* indicate a similar scenario in PUUV-infected bank  
347 voles; virus reverts early macrophage responses from a typical inflammatory milieu towards  
348 immunomodulation with subsequent inhibition of IFN- $\gamma$  expression, Th1 cell activation and virus  
349 clearance. In fact, corroborating the differential response between human and reservoir host APCs

350 to hantavirus infection, human dendritic cells have been shown to decrease IL-10 expression while  
351 elevating pro-inflammatory responses when in contact with Andes orthohantavirus-infected  
352 endothelial cells (39).

353

354 Inadequate humoral responses have not been previously considered as a mechanism of persistent  
355 hantavirus infections in reservoir hosts. This is due to observations of strong virus-specific IgG  
356 responses and high neutralizing antibody titers in hantavirus infected wild rodents (36-38).  
357 Therefore, our finding that PUUV-specific Ig responses were significantly delayed in voles infected  
358 with PUUV-Suo was unexpected, as was the lack of seroconversion in two of three bank voles  
359 infected with PUUV-wt. Interestingly, an acute increase in total IgG levels that cannot be solely  
360 explained by the PUUV-specific Ig response was observed for PUUV-Suo and PUUV-wt. An  
361 increase in total Ig levels, i.e. hypergammaglobulinemia, is strongly associated with other persistent  
362 viral infections in both humans and rodents (40-42). The mechanisms by which  
363 hypergammaglobulinemia facilitates persistent infections are currently unknown but could involve  
364 virus-mediated polyclonal activation of B cells and subsequent exhaustion of specific B cell  
365 responses (41). These could allow sufficient time for the virus to establish systemic infection that,  
366 despite later robust virus-specific humoral responses, the host is unable to clear.

367

368 Our results show that a hantavirus isolated using allogeneic reservoir host cells may retain wild-type  
369 characteristics better than a Vero E6-adapted virus, and should be considered as the preferred  
370 method for future hantavirus isolations and experimental infections. Using these techniques, we  
371 demonstrated that immune regulatory mechanisms are likely to facilitate persistent PUUV  
372 infections in bank voles, which provide insights into other difficult to study wildlife-hantavirus  
373 systems and may help guide novel therapeutic strategies for human infections.

374

## 375 Materials and methods

### 376 *Ethics statement*

377 All vole trapping and experimental procedures performed in Finland were approved the Animal  
378 Experimental Board of Finland (license number ESAVI/6935/04.10.07/2016). Wild bank voles  
379 representing the Eastern evolutionary lineage were captured in Ugglan live traps around central  
380 Finland. To generate the Mygla.REC.B cell line, an adult bank vole of the Western evolutionary  
381 lineage was taken from the breeding colony at the Friedrich-Loeffler-Institut, Greifswald-Insel  
382 Riems, Germany.

383

### 384 *Establishment of the permanent cell line*

385 The bank vole from the breeding colony was anaesthetized with isoflurane and euthanized by using  
386 CO<sub>2</sub>. During dissection the kidney was removed and shipped in transport medium on ice to the  
387 Institute of Virology in Bonn, where the cell line was established. Briefly, the kidney was washed in  
388 sterile PBS and minced with a blade. Tissue was resolved with 37°C Dulbecco's minimum essential  
389 medium-high glucose (DMEM; Sigma Aldrich) supplemented with 10 % inactivated fetal calf  
390 serum (FCS), 100 IU/ml Penicillin, 100 µg/ml Streptomycin, 2mM L-glutamine and a mix of non-  
391 essential amino acids (Sigma Aldrich), containing in addition 1% Ofloxain (Tarivid), and seeded  
392 into 6-well plates. After 5-7 days, primary cell growth could be observed, and medium was  
393 renewed. Primary cells were immortalized when confluency of 40-50% was reached by using a  
394 lentiviral system carrying the large T antigen of SV40, as described previously (43). Once an  
395 increase in cell proliferation was observed, cells were further passaged and cryoconserved.

396

### 397 *Virus isolation and propagation*

398 For virus isolation, a serologically confirmed PUUV-infected bank vole from Suonenjoki, Finland  
399 and representing Eastern evolutionary lineage, was euthanized and lung samples were collected and



400 frozen at -70 °C. The frozen lungs were then homogenized with a mortar and pestle in 1 ml of  
401 phosphate-buffered saline (PBS) over dry ice. After thawing, 500 µl of the homogenate was  
402 incubated for 1 h with semi-confluent Mygla.REC.B cells, which were grown similarly as described  
403 above. Mygla.REC.B cells were passaged at 3-day intervals until 100% of cells were found to be  
404 infected with PUUV via immunofluorescence assay as described below. We named the newly  
405 isolated hantavirus PUUV-Suonenjoki (PUUV-Suo) due to the geographical location of the bank  
406 vole trapping site.

407

408 An attenuated PUUV isolate, PUUV-Kazan strain (21), which was previously isolated and  
409 propagated in Vero E6 cells (green monkey kidney epithelial cell line; ATCC no. CRL-1586),  
410 served as comparison for experimental PUUV-Suo infections. PUUV-Kazan was grown in Vero E6  
411 cells using Minimum Essential Medium (MEM; Sigma Aldrich) and supplemented with 10 %  
412 inactivated FCS, 100 IU/ml of Penicillin and 100 µg/ml of Streptomycin and 2mM of L-glutamine.  
413 Both PUUV-Suo and PUUV-Kazan strains were purified from supernatants of infected cells  
414 through a 30 % sucrose cushion by ultracentrifugation and resuspended in corresponding growth  
415 medium. Virus titers were measured by incubating diluted virus stocks with Vero E6 cells for 24 h  
416 at 37 °C, followed by acetone fixation and staining with a rabbit polyclonal antibody specific for  
417 PUUV N protein and AlexaFluor488-conjugated secondary antibody. Fluorescent focus-forming  
418 units (FFFU)/ml were counted under a UV microscope (Zeiss). UV inactivation of virus  
419 preparations was carried out using a Stratalinker UV crosslinker (300,000 µJ/cm<sup>2</sup>).

420

#### 421 *Evolutionary lineage determination of bank voles and cell line*

422 The lineage determination was based on an established protocol using amplification of a partial  
423 cytochrome *b* gene segment and comparison to prototype sequences of the various bank vole  
424 lineages (28, 44)

425

426 *Next-generation sequencing*

427 Prior to RNA extraction, the bank vole lung homogenate and Mygla.REC.B cell culture supernatant  
428 were treated with a cocktail of micrococcal nuclease (New England BioLabs) and benzonase  
429 (Millipore) for 1 h at +37°C. RNA was extracted with Trizol and ribosomal RNA was removed  
430 using a NEBNext rRNA depletion kit (New England BioLabs), according to manufacturer  
431 instructions. The sequencing library was prepared using a NEBNext Ultra II RNA library prep kit  
432 (New England BioLabs) and quantified using a NEBNext Library Quant kit for Illumina (New  
433 England BioLabs). Pooled libraries were then sequenced on a MiSeq platform (Illumina) using a  
434 MiSeq v2 reagent kit with 150 bp paired-end reads. Raw sequence reads were trimmed and low-  
435 quality (quality score <30) and short (<50 nt) sequences were removed using Trimmomatic (45).  
436 Thereafter, *de novo* assembly was conducted using MegaHit, followed by re-assembly against the  
437 *de-novo* assembled consensus sequences using BWA-MEM implemented in SAMTools version 1.8  
438 (46).

439

440 *Phylogenetic analysis*

441 The complete L-, M- and S-segment sequences were downloaded from GenBank and aligned using  
442 MUSCLE program package (47). Substitution model was estimated using jModeltest2 (48).  
443 Phylogenetic trees were then constructed using the Bayesian Markov chain Monte Carlo (MCMC)  
444 method, implemented in Mr Bayes version 3.2 (49) using a GTR-G-I model of substitution with 2  
445 independent runs and 4 chains per run. The analysis was run for 500 000 states and sampled every  
446 5,000 steps.

447

448 *Cell cultures*

449 PUUV-infected cells, grown on a black 96-well plate (Nunc), were detected by  
450 immunofluorescence assay after acetone fixation using a polyclonal rabbit anti-PUUN serum  
451 diluted 1:1000 in PBS followed by AlexaFluor488-conjugated donkey anti-rabbit secondary  
452 antibody (Thermo Scientific). Nuclei were stained using Hoechst 33420 diluted 1:5000 in PBS.  
453 Images were taken using a Leica TCS SP8 X confocal microscope (Biomedicum Imaging Unit core  
454 facility, Medicum, University of Helsinki).

455

456 Non- and PUUV-Suo infected Mygla.REC.B cells were exogenously stimulated with TLR-3 ligand  
457 polyI:C (10 µg/ml, Sigma Aldrich) or Sendai virus (multiplicity of infection 1; received from Prof.  
458 Ilkka Julkunen; National Institute of Health and Welfare, Helsinki, Finland). Cells were collected at  
459 1 and 3-d post-treatment and RNA expression analysis was performed as described below. All  
460 experiments were conducted in duplicate.

461

#### 462 *Experimental infections*

463 Wild-captured voles from PUUV endemic region in Central Finland were transported to the  
464 University of Helsinki BSL-3 facility and acclimatized to individually ventilated biocontainment  
465 cages (ISOcage, Scanbur) for two days with *ad libitum* water and food (rodent pellets and small  
466 pieces of turnip every second day). Prior to any treatments, a small blood sample was collected  
467 from the retro-orbital sinus of each animal, and their PUUV infection status was determined by  
468 immunofluorescence assay (see below).

469

470 PUUV seronegative voles were divided into five treatment groups and subcutaneously injected  
471 with: 1) 100 µl of PBS (mock infection; n = 2 per time point), 2) 10,000 FFFUs of PUUV-Suo (n =  
472 4 per time point), 3) UV-inactivated PUUV-Suo (n = 2 per time point), 4) 10,000 FFFUs of PUUV-  
473 Kazan (n = 2-3 per time point), or 5) a pooled homogenate prepared from the lungs of five PUUV-

474 seropositive wild bank voles (PUUV-wt; n = 4 per time point). A total of 43 individual voles were  
475 used across the different time points and experimental treatments. The lung homogenate was  
476 obtained after grinding frozen lung tissue from naturally PUUV-infected voles (confirmed by  
477 PUUV-specific RT-PCR) with mortar and pestle in 1 ml PBS on dry ice. The PUUV-Suo and  
478 PUUV-wt were derived from voles captured from the same geographical area in Central Finland  
479 and together with voles used for experimental infections represent the Eastern bank vole  
480 evolutionary lineage. Blood samples from all treatment groups were collected from the retro-orbital  
481 sinus at 1wk intervals pi. Urine samples were collected from PUUV-Suo infected voles at 3d, and 1  
482 and 2wks pi. Voles were sacrificed using isoflurane anesthesia, followed by cervical dislocation at  
483 3d pi and 1 (7d), 2 (14-16d), and 5wks (35-38d) pi to collect samples for viral RNA load and  
484 distribution analyses, immunohistology and gene expression assays.

485

#### 486 *Virus quantification*

487 Following euthanasia and dissections, RNA extractions on bank vole tissues and urine were  
488 performed using Trisure (Bioline) according to the manufacturers' instructions, with 10 µg/ml  
489 glycogen as carrier. RNA was directly subjected to PUUV S-segment RT-qPCR analysis based on a  
490 previously described protocol (50), with TaqMan fast virus 1-step master mix (Thermo scientific)  
491 using AriaMx instrumentation (Agilent).

492

#### 493 *Histological and immunohistochemistry examinations*

494 Two wild-trapped, naturally PUUV-infected adult bank voles were dissected and samples from  
495 brain, heart, lung, liver, kidneys and spleen were fixed in 10% neutral-buffered formalin. Similarly,  
496 lung, liver, spleen and kidney samples were collected and formalin-fixed from each two PUUV-Suo  
497 infected voles euthanized at 3d, 1wk, 2wks, and 5wks pi and two PUUV-wt infected bank voles  
498 euthanized at 5wks pi. The latter two voles were initially frozen at -80 °C, and tissue fixation was

499 achieved by slowly thawing the organ samples in ice-cold formalin. After 4-7 days in formalin,  
500 tissue specimens were transferred to 70% ethanol, trimmed and routinely paraffin wax embedded.  
501 Consecutive sections (3-5  $\mu\text{m}$ ) were prepared and routinely stained with hematoxylin-eosin (HE) or  
502 subjected to immunohistology for the detection of PUUV N antigen in tissues.  
503  
504 Anti-PUUV N protein antiserum was generated by immunization of a single rabbit with PUUV N  
505 protein produced via baculovirus-mediated expression. The same batch of PUUV N protein was  
506 used in an earlier diagnostic study (51) and the immunization by BioGenes GmbH (Berlin,  
507 Germany) was as described in (52). Immunohistology was performed in an autostainer (Dako) using  
508 the custom-made rabbit polyclonal antiserum and the horseradish peroxidase (HRP) method.  
509 Briefly, sections were deparaffinized and rehydrated through graded alcohol. Antigen retrieval was  
510 achieved by 20 min incubation in citrate buffer (pH 6.0) at 98°C in a pressure cooker. This was  
511 followed by incubation with the primary antibody (diluted 1:1,000 in dilution buffer; Dako) for 60  
512 min at room temperature (RT), a 10 min incubation at room temperature (RT) with peroxidase  
513 blocking buffer (Dako) and a 30 min incubation at RT with Envision+System HRP Rabbit (Dako).  
514 The reaction was visualized with diaminobenzidin (DAB; Dako). After counterstaining with  
515 hematoxylin for 2 sec, sections were dehydrated and placed on a coverslip with Tissue-Tek Film  
516 (Sysmex). A formalin-fixed and paraffin embedded pellet of Vero E6 cells infected with PUUV for  
517 14 days served as a positive control (infected cells exhibit a finely granular to coarse cytoplasmic  
518 staining).

519

#### 520 *PUUV-specific and total IgG assays*

521 Immunofluorescence assays, using PUUV Sotkamo strain-infected Vero E6 cells fixed to  
522 microscope slides with acetone, were used to evaluate PUUV-specific Ig in bank vole blood (53).  
523 After incubating slides with blood diluted in PBS (1:10), bound Igs were detected with Fluorescein

524 isothiocyanate (FITC)-conjugated rabbit anti-mouse Ig antibody (Dako Cytomation). To quantify  
525 total IgG levels, an enzyme-linked immunosorbent assay kit detecting mouse IgG (Mabtech) was  
526 used, replacing the mouse IgG standard with bank vole IgG 4G2 (specific for the PUUV  
527 glycoprotein) (54). One PUUV-wt infected vole had high total IgG levels already at the beginning  
528 of the experiment and was removed from the analysis.

529

### 530 *Splenocyte stimulations*

531 To directly assess the effect of PUUV infection on immune cells, we extracted single cell  
532 suspensions from the homogenized spleens of 3 wild-caught PUUV-seronegative bank voles by  
533 washing the homogenate through 70  $\mu$ M cell strainers (Sigma Aldrich) with 10 ml PBS. After  
534 pelleting through centrifugation, cells were incubated in 3 ml of Ammonium-Chloride-Potassium  
535 (ACK) lysing solution to lyse the red blood cells, washed in PBS and frozen in CryoStor CS10  
536 (Sigma Aldrich) at -130°C until further investigation. After thawing and washing in PBS,  
537 splenocytes were suspended in RPMI-1640 supplemented with 10% inactivated FCS, 100 IU/ml of  
538 Penicillin, 100  $\mu$ g/ml of Streptomycin, 2mM of L-glutamine and 25 mM Hepes pH 7.4. For  
539 stimulations, 1 million cells were either: 1) untreated, 2) treated with 20  $\mu$ g/ml lipopolysaccharide  
540 (LPS), or 3) infected with virus at a m.o.i. of 0.01 in 250  $\mu$ l of medium. Cells were collected after 3  
541 days of incubation at 37 °C and subjected to RT-qPCR as described below. As an indicator of  
542 splenocyte viability after thawing, we used only splenocytes that showed a minimum of 5-fold  
543 increase in IFN- $\gamma$  mRNA levels in response to LPS when compared to untreated, non-infected  
544 controls.

545

### 546 *Transcription factor and cytokine assays*

547 To analyze bank vole gene expression profiles, RNA extracted from spleens and cell cultures was  
548 reverse transcribed to complementary DNA (cDNA) using random hexamers and RevertAid reverse

549 transcriptase (Thermo Scientific). Relative quantitative PCR was performed with Maxima SYBR  
550 Green master mix (Thermo Scientific) using AriaMx instrumentation (Agilent).  
551  
552 Primers used to measure the mRNAs levels of the interferon-inducible gene Mx2, a marker of  
553 innate immunity activation towards virus infection (55), and actin, used for normalization of mRNA  
554 levels between samples, are described in (56). Primers used to amplify bank vole mRNAs of Tbet,  
555 Gata3, FoxP3, IFN- $\gamma$ , TGF- $\beta$ , and IL-10 were originally designed for field voles and are described  
556 in (57). Primers to detect IL-4 mRNA (Forward: 5'-GCT CTG CCT TCT AGC ATG TAC T-3' and  
557 Reverse: 5'-TGC ATG GCG TCC CTT TTT CT-3') were designed based on the annotated mRNA  
558 sequence of the prairie vole (*Microtus ochrogaster*). All primers were validated for the  
559 corresponding bank vole sequence based on the expected amplicon sizes in agarose gels. Samples  
560 were excluded from further analysis when the PCR did not produce the expected single peak  
561 melting curve. Fold changes of individual mRNA expression levels relative to mock-infected  
562 controls were performed by the comparative CT method (58).

563

#### 564 *Statistical analyses*

565 Statistical differences between groups were assessed by one- or two-way ANOVA with Dunnett's  
566 or Sivak's multiple comparison tests as indicated in the figure legends. Analyses were conducted  
567 using GraphPad Prism version 8.1.2.

568

#### 569 *Acknowledgements*

570 We thank Sanna Mäki, Irina Suomalainen (University of Helsinki) and laboratory technicians in the  
571 Histology Laboratory at the University of Zurich for technical assistance. The authors would like to  
572 thank Markus Keller and Susanne Röhrs for provision of the bank vole, Matthias Lenk for  
573 dissection and provision of the kidney tissue for establishment of the Mygla.REC.B cell line, Dörte

574 Kaufmann, Florian Binder and Stephan Drewes for determination of the evolutionary lineage by  
575 cytochrome *b* gene sequencing, and Stephan Drewes for helpful comments. This work was  
576 financially supported by the Academy of Finland (Grant 1275597 to TS, 1308613 to JH) and the  
577 Finnish Cultural Foundation (grant to KMF). The work of RGU (RoBoPub consortium) was  
578 supported by the Federal Ministry of Education and Research (BMBF) within the Research  
579 Network Zoonotic Infectious Diseases (FKZ 01KI1721A RGU). The work of IE (EpiZell) was  
580 funded by Federal Ministry of Education and Research (BMBF) through the National Research  
581 Platform for Zoonosis Research (FKZ 01KI1308).

582

## 583 References

584

585

### References

- 586 1. Plowright RK, Parrish CR, McCallum H, Hudson PJ, Ko AI, Graham AL, et al. Pathways to  
587 zoonotic spillover. *Nat Rev Microbiol*. 2017 Aug;15(8):502-10.
- 588 2. Viana M, Mancy R, Biek R, Cleaveland S, Cross PC, Lloyd-Smith JO, et al. Assembling  
589 evidence for identifying reservoirs of infection. *Trends Ecol Evol*. 2014 May;29(5):270-9.
- 590 3. Han BA, Park AW, Jolles AE, Altizer S. Infectious disease transmission and behavioural  
591 allometry in wild mammals. *J Anim Ecol*. 2015 May;84(3):637-46.
- 592 4. Plowright RK, Field HE, Smith C, Divljan A, Palmer C, Tabor G, et al. Reproduction and  
593 nutritional stress are risk factors for Hendra virus infection in little red flying foxes (*Pteropus*  
594 *scapulatus*). *Proc Biol Sci*. 2008 Apr 7;275(1636):861-9.
- 595 5. Altizer S, Bartel R, Han BA. Animal migration and infectious disease risk. *Science*. 2011 Jan  
596 21;331(6015):296-302.
- 597 6. Forbes KM, Sironen T, Plyusnin A. Hantavirus maintenance and transmission in reservoir host  
598 populations. *Curr Opin Virol*. 2018 Feb;28:1-6.
- 599 7. Jonsson CB, Figueiredo LT, Vapalahti O. A global perspective on hantavirus ecology,  
600 epidemiology, and disease. *Clin Microbiol Rev*. 2010 Apr;23(2):412-41.
- 601 8. Vaheri A, Strandin T, Hepojoki J, Sironen T, Henttonen H, Makela S, et al. Uncovering the  
602 mysteries of hantavirus infections. *Nat Rev Microbiol*. 2013 Aug;11(8):539-50.



- 603 9. Vapalahti O, Mustonen J, Lundkvist A, Henttonen H, Plyusnin A, Vaheri A. Hantavirus  
604 infections in Europe. *Lancet Infect Dis*. 2003 Oct;3(10):653-61.
- 605 10. Kotlik P, Deffontaine V, Mascheretti S, Zima J, Michaux JR, Searle JB. A northern glacial  
606 refugium for bank voles (*Clethrionomys glareolus*). *Proc Natl Acad Sci U S A*. 2006 Oct  
607 3;103(40):14860-4.
- 608 11. Filipi K, Markova S, Searle JB, Kotlik P. Mitogenomic phylogenetics of the bank vole  
609 *Clethrionomys glareolus*, a model system for studying end-glacial colonization of Europe. *Mol*  
610 *Phylogenet Evol*. 2015 Jan;82 Pt A:245-57.
- 611 12. Wójcik JM, Kawałko A, Marková S, Searle JB, Kotlík P. Phylogeographic signatures of  
612 northward post-glacial colonization from high-latitude refugia: a case study of bank voles using  
613 museum specimens. *Journal of Zoology*. 2010;281:249-62.
- 614 13. Deffontaine V, Libois R, Kotlik P, Sommer R, Nieberding C, Paradis E, et al. Beyond the  
615 Mediterranean peninsulas: evidence of central European glacial refugia for a temperate forest  
616 mammal species, the bank vole (*Clethrionomys glareolus*). *Mol Ecol*. 2005 May;14(6):1727-39.
- 617 14. Oldstone MB. Viral persistence: parameters, mechanisms and future predictions. *Virology*. 2006  
618 Jan 5;344(1):111-8.
- 619 15. Easterbrook JD, Klein SL. Immunological mechanisms mediating hantavirus persistence in  
620 rodent reservoirs. *PLoS Pathog*. 2008 Nov;4(11):e1000172.
- 621 16. Schountz T, Prescott J. Hantavirus immunology of rodent reservoirs: current status and future  
622 directions. *Viruses*. 2014 Mar 14;6(3):1317-35.
- 623 17. Yanagihara R, Amyx HL, Gajdusek DC. Experimental infection with Puumala virus, the  
624 etiologic agent of nephropathia epidemica, in bank voles (*Clethrionomys glareolus*). *J Virol*. 1985  
625 Jul;55(1):34-8.
- 626 18. Botten J, Mirowsky K, Kusewitt D, Bharadwaj M, Yee J, Ricci R, et al. Experimental infection  
627 model for Sin Nombre hantavirus in the deer mouse (*Peromyscus maniculatus*). *Proc Natl Acad Sci*  
628 *U S A*. 2000 Sep 12;97(19):10578-83.
- 629 19. Prescott J, Feldmann H, Safronetz D. Amending Koch's postulates for viral disease: When  
630 "growth in pure culture" leads to a loss of virulence. *Antiviral Res*. 2017 Jan;137:1-5.
- 631 20. Safronetz D, Prescott J, Feldmann F, Haddock E, Rosenke R, Okumura A, et al.  
632 Pathophysiology of hantavirus pulmonary syndrome in rhesus macaques. *Proc Natl Acad Sci U S*  
633 *A*. 2014 May 13;111(19):7114-9.
- 634 21. Lundkvist A, Cheng Y, Sjolander KB, Niklasson B, Vaheri A, Plyusnin A. Cell culture  
635 adaptation of Puumala hantavirus changes the infectivity for its natural reservoir, *Clethrionomys*  
636 *glareolus*, and leads to accumulation of mutants with altered genomic RNA S segment. *J Virol*.  
637 1997 Dec;71(12):9515-23.

- 638 22. Klingstrom J, Plyusnin A, Vaheri A, Lundkvist A. Wild-type Puumala hantavirus infection  
639 induces cytokines, C-reactive protein, creatinine, and nitric oxide in cynomolgus macaques. *J Virol*.  
640 2002 Jan;76(1):444-9.
- 641 23. Plyusnina A, Razzauti M, Sironen T, Niemimaa J, Vapalahti O, Vaheri A, et al. Analysis of  
642 complete Puumala virus genome, Finland. *Emerg Infect Dis*. 2012 Dec;18(12):2070-2.
- 643 24. Razzauti M, Plyusnina A, Henttonen H, Plyusnin A. Microevolution of Puumala hantavirus  
644 during a complete population cycle of its host, the bank vole (*Myodes glareolus*). *PLoS One*. 2013  
645 May 22;8(5):e64447.
- 646 25. Emeny JM, Morgan MJ. Regulation of the interferon system: evidence that Vero cells have a  
647 genetic defect in interferon production. *J Gen Virol*. 1979 Apr;43(1):247-52.
- 648 26. Nemirov K, Lundkvist A, Vaheri A, Plyusnin A. Adaptation of Puumala hantavirus to cell  
649 culture is associated with point mutations in the coding region of the L segment and in the  
650 noncoding regions of the S segment. *J Virol*. 2003 Aug;77(16):8793-800.
- 651 27. Boratynski Z, Melo-Ferreira J, Alves PC, Berto S, Koskela E, Pentikainen OT, et al. Molecular  
652 and ecological signs of mitochondrial adaptation: consequences for introgression? *Heredity (Edinb)*.  
653 2014 Oct;113(4):277-86.
- 654 28. Drewes S, Ali HS, Saxenhofer M, Rosenfeld UM, Binder F, Cuypers F, et al. Host-Associated  
655 Absence of Human Puumala Virus Infections in Northern and Eastern Germany. *Emerg Infect Dis*.  
656 2017 Jan;23(1):83-6.
- 657 29. Binder F, Lenk M, Weber S, Stoek F, Dill V, Reiche S, et al. Common vole (*Microtus arvalis*)  
658 and bank vole (*Myodes glareolus*) derived permanent cell lines differ in their susceptibility and  
659 replication kinetics of animal and zoonotic viruses. *J Virol Methods*. 2019 Sep 9:113729.
- 660 30. Green W, Feddersen R, Yousef O, Behr M, Smith K, Nestler J, et al. Tissue distribution of  
661 hantavirus antigen in naturally infected humans and deer mice. *J Infect Dis*. 1998 Jun;177(6):1696-  
662 700.
- 663 31. Schountz T, Prescott J, Cogswell AC, Oko L, Mirowsky-Garcia K, Galvez AP, et al. Regulatory  
664 T cell-like responses in deer mice persistently infected with Sin Nombre virus. *Proc Natl Acad Sci*  
665 *U S A*. 2007 Sep 25;104(39):15496-501.
- 666 32. Easterbrook JD, Zink MC, Klein SL. Regulatory T cells enhance persistence of the zoonotic  
667 pathogen Seoul virus in its reservoir host. *Proc Natl Acad Sci U S A*. 2007 Sep 25;104(39):15502-7.
- 668 33. Rojas JM, Avia M, Martin V, Sevilla N. IL-10: A Multifunctional Cytokine in Viral Infections.  
669 *J Immunol Res*. 2017;2017:6104054.
- 670 34. Blackburn SD, Wherry EJ. IL-10, T cell exhaustion and viral persistence. *Trends Microbiol*.  
671 2007 Apr;15(4):143-6.
- 672 35. Ejrnaes M, Filippi CM, Martinic MM, Ling EM, Togher LM, Crotty S, et al. Resolution of a  
673 chronic viral infection after interleukin-10 receptor blockade. *J Exp Med*. 2006 Oct  
674 30;203(11):2461-72.

- 675 36. Brooks DG, Trifilo MJ, Edelmann KH, Teyton L, McGavern DB, Oldstone MB. Interleukin-10  
676 determines viral clearance or persistence in vivo. *Nat Med.* 2006 Nov;12(11):1301-9.
- 677 37. Tian Y, Mollo SB, Harrington LE, Zajac AJ. IL-10 Regulates Memory T Cell Development and  
678 the Balance between Th1 and Follicular Th Cell Responses during an Acute Viral Infection. *J*  
679 *Immunol.* 2016 Aug 15;197(4):1308-21.
- 680 38. Snell LM, Osokine I, Yamada DH, De la Fuente JR, Elsaesser HJ, Brooks DG. Overcoming  
681 CD4 Th1 Cell Fate Restrictions to Sustain Antiviral CD8 T Cells and Control Persistent Virus  
682 Infection. *Cell Rep.* 2016 Sep 20;16(12):3286-96.
- 683 39. Marsac D, Garcia S, Fournet A, Aguirre A, Pino K, Ferres M, et al. Infection of human  
684 monocyte-derived dendritic cells by ANDES Hantavirus enhances pro-inflammatory state, the  
685 secretion of active MMP-9 and indirectly enhances endothelial permeability. *Virol J.* 2011 May  
686 13;8:223,422X-8-223.
- 687 40. De Milito A, Nilsson A, Titanji K, Thorstensson R, Reizenstein E, Narita M, et al. Mechanisms  
688 of hypergammaglobulinemia and impaired antigen-specific humoral immunity in HIV-1 infection.  
689 *Blood.* 2004 Mar 15;103(6):2180-6.
- 690 41. Hunziker L, Recher M, Macpherson AJ, Ciurea A, Freigang S, Hengartner H, et al.  
691 Hypergammaglobulinemia and autoantibody induction mechanisms in viral infections. *Nat*  
692 *Immunol.* 2003 Apr;4(4):343-9.
- 693 42. Kawamoto H, Sakaguchi K, Takaki A, Ogawa S, Tsuji T. Autoimmune responses as assessed  
694 by hypergammaglobulinemia and the presence of autoantibodies in patients with chronic hepatitis  
695 C. *Acta Med Okayama.* 1993 Oct;47(5):305-10.
- 696 43. Eckerle I, Ehlen L, Kallies R, Wollny R, Corman VM, Cottontail VM, et al. Bat airway  
697 epithelial cells: a novel tool for the study of zoonotic viruses. *PLoS One.* 2014 Jan 13;9(1):e84679.
- 698 44. Schlegel M, Ali HS, Stieger N, Groschup MH, Wolf R, Ulrich RG. Molecular identification of  
699 small mammal species using novel cytochrome B gene-derived degenerated primers. *Biochem*  
700 *Genet.* 2012 Jun;50(5-6):440-7.
- 701 45. Bolger AM, Lohse M, Usadel B. Trimmomatic: a flexible trimmer for Illumina sequence data.  
702 *Bioinformatics.* 2014 Aug 1;30(15):2114-20.
- 703 46. Li H, Handsaker B, Wysoker A, Fennell T, Ruan J, Homer N, et al. The Sequence  
704 Alignment/Map format and SAMtools. *Bioinformatics.* 2009 Aug 15;25(16):2078-9.
- 705 47. Edgar RC. MUSCLE: a multiple sequence alignment method with reduced time and space  
706 complexity. *BMC Bioinformatics.* 2004 Aug 19;5:113,2105-5-113.
- 707 48. Darriba D, Taboada GL, Doallo R, Posada D. jModelTest 2: more models, new heuristics and  
708 parallel computing. *Nat Methods.* 2012 Jul 30;9(8):772.
- 709 49. Ronquist F, Teslenko M, van der Mark P, Ayres DL, Darling A, Höhna S, et al. MrBayes 3.2:  
710 efficient Bayesian phylogenetic inference and model choice across a large model space. *Syst Biol.*  
711 2012 May;61(3):539-42.

- 712 50. Niskanen S, Jaaskelainen A, Vapalahti O, Sironen T. Evaluation of Real-Time RT-PCR for  
713 Diagnostic Use in Detection of Puumala Virus. *Viruses*. 2019 Jul 19;11(7):10.3390/v11070661.
- 714 51. Hepojoki S, Hepojoki J, Hedman K, Vapalahti O, Vaheri A. Rapid homogeneous immunoassay  
715 based on time-resolved Forster resonance energy transfer for serodiagnosis of acute hantavirus  
716 infection. *J Clin Microbiol*. 2015 Feb;53(2):636-40.
- 717 52. Korzyukov Y, Hetzel U, Kipar A, Vapalahti O, Hepojoki J. Generation of Anti-Boa  
718 Immunoglobulin Antibodies for Serodiagnostic Applications, and Their Use to Detect Anti-  
719 Reptarenavirus Antibodies in Boa Constrictor. *PLoS One*. 2016 Jun 29;11(6):e0158417.
- 720 53. Kallio-Kokko H, Laakkonen J, Rizzoli A, Tagliapietra V, Cattadori I, Perkins SE, et al.  
721 Hantavirus and arenavirus antibody prevalence in rodents and humans in Trentino, Northern Italy.  
722 *Epidemiol Infect*. 2006 Aug;134(4):830-6.
- 723 54. Lundkvist A, Niklasson B. Bank vole monoclonal antibodies against Puumala virus envelope  
724 glycoproteins: identification of epitopes involved in neutralization. *Arch Virol*. 1992;126(1-4):93-  
725 105.
- 726 55. Haller O, Kochs G. Human MxA protein: an interferon-induced dynamin-like GTPase with  
727 broad antiviral activity. *J Interferon Cytokine Res*. 2011 Jan;31(1):79-87.
- 728 56. Stoltz M, Sundstrom KB, Hidmark A, Tolf C, Vene S, Ahlm C, et al. A model system for in  
729 vitro studies of bank vole borne viruses. *PLoS One*. 2011;6(12):e28992.
- 730 57. Jackson JA, Begon M, Birtles R, Paterson S, Friberg IM, Hall A, et al. The analysis of  
731 immunological profiles in wild animals: a case study on immunodynamics in the field vole,  
732 *Microtus agrestis*. *Mol Ecol*. 2011 Mar;20(5):893-909.
- 733 58. Schmittgen TD, Livak KJ. Analyzing real-time PCR data by the comparative C(T) method. *Nat*  
734 *Protoc*. 2008;3(6):1101-8.
- 735
- 736

737 **Supplementary figures**

738

739 Supplementary Figure 1. Phylogenetic analysis of the complete PUUV-Suo S segment. Analysis of  
740 both the original bank vole lung (lung homogenate) and Mygla.REC.B.-isolated (cell culture  
741 supernatant) are included and marked as red.

742 Supplementary Figure 2. Phylogenetic analysis of the complete PUUV-Suo M segment. Analysis of  
743 both the original bank vole lung (lung homogenate) and Mygla.REC.B.-isolated (cell culture  
744 supernatant) are included and marked as red.

745 Supplementary Figure 3. Phylogenetic analysis of the complete PUUV-Suo L segment. Analysis of  
746 both the original bank vole lung (lung homogenate) and Mygla.REC.B.-isolated (cell culture  
747 supernatant) are included and marked as red.

748

749

750

751

752

753

754

755 Figures

756

757 Figure 1. Immunofluorescence image showing successful isolation of PUUV-Suo in a bank vole  
758 cell line. Non-infected (mock) or PUUV-Suo infected bank vole kidney epithelial cells  
759 (Mygla.REC.B) were stained for nuclei (DNA) using Hoechst 33420 (blue) and for PUUV  
760 nucleocapsid protein (PUUN) using PUUN-specific rabbit polyclonal antibody followed by  
761 AlexaFluor488-conjugated secondary antibody (green).

762

763 Figure 2. Interaction between PUUV-Suo infection and innate immune pathway stimulation in  
764 Mygla.REC.B cells. **(A)** Non-infected (mock) or PUUV-Suo infected Mygla.REC.B cells were  
765 either non-stimulated (No stim), stimulated with polyI:C or infected with Sendai virus (Sendai) for  
766 1 day. RNA was isolated from cells and subjected to relative quantification of Mx2 mRNA using  
767 RT-qPCR. **(B)** PUUV-Suo infected Mygla.REC.B cells were either non-stimulated, stimulated with  
768 polyI:C or infected with Sendai virus for 1 and 3 days. RNA was isolated from cells and subjected  
769 to relative quantification of PUUV S segment RNA using RT-qPCR. \*\* ( $p < 0.01$ ) or \*\*\*\* ( $p <$   
770  $0.001$ ). ns, not significant. Bars represent mean  $\pm$  standard deviation ( $n = 2$ ).

771

772 Figure 3. Viral RNA load analysis of experimentally and naturally infected bank voles. The lungs,  
773 spleen and kidneys of bank voles infected with PUUV-Suo **(A, n = 4)**, PUUV-Kazan **(B, n = 3)** or  
774 PUUV-wt **(C, n = 3)** were collected at indicated times post infection to quantify PUUV copy  
775 numbers by PUUV S segment-specific qPCR. In addition, seropositive naturally PUUV-infected  
776 bank voles with unknown infection timepoints were included as reference **(D, n = 27-38)**. Bars  
777 represent mean + standard deviation.

778

779 Figure 4. PUUV target cell analysis in experimental and natural infections. **(A)** Kidneys of naturally  
780 infected bank voles: Viral antigen expression is apparent in occasional glomerular endothelial cells  
781 (arrowheads) and occasional vascular endothelial cells (inset: arrows). **(B)** Lungs and spleen of  
782 naturally infected bank voles: A variable number of vascular/capillary endothelial cells (arrows) and  
783 pneumocytes (arrowheads) express viral antigen in the lungs. Very few cells in the splenic red pulp,  
784 consistent with macrophages, are also found to express viral antigen (inset: arrow). **(C)** Kidney of  
785 PUUV-Suo infected bank vole at 1 wk pi show scattered glomerular endothelial cells with viral  
786 antigen expression. **(D)** PUUV-Suo infected vole at 3 d exhibit occasional positive alveolar  
787 epithelial cells in the lungs (arrowhead, also in top inset), and scattered positive Kupffer cells in the  
788 liver (bottom inset: arrow). **(E)** The spleen of PUUV-Suo infected voles at 2 wks pi show very  
789 limited viral antigen expression, which is restricted to individual macrophages, for example in the  
790 splenic red pulp (arrowheads). **(F)** The lungs of PUUV-wt infected bank vole at 5 wks pi show viral  
791 antigen expression restricted to occasional vascular endothelial cells (left, arrow) and scattered  
792 pneumocytes in the lungs (right, arrowhead). The images are representative of two voles analyzed  
793 by immunohistochemistry for PUUV N protein expression in naturally infected voles and at each  
794 time point of PUUV-Suo or PUUV-wt infections. Haematoxylin counterstain. Bars = 10  $\mu$ m.

795

796 Figure 5. Assessment of PUUV-specific Ig and total IgG responses in blood of experimentally and  
797 naturally infected bank voles. **(A)** PUUV-specific Ig titers in blood of PUUV-Suo (n = 4), PUUV-  
798 Kazan (n = 3-5) and PUUV-wt (n = 3) infected voles at indicated time points. **(B)** Total IgG levels  
799 in blood of PUUV-Suo (n = 4-12), PUUV-Kazan (n = 2) and PUUV-wt (n = 2) infected voles at  
800 indicated time points. As a comparison, blood of mock- (n = 2-8) and UV-inactivated PUUV-Suo (n  
801 = 2) infected voles were also assessed at the indicated time points. **(C)** PUUV-specific Ig titers and  
802 total IgG levels in blood of naturally PUUV-infected or non-infected bank voles with unknown

803 infection timepoints (n = 8). Bars represent mean +/- standard deviation. \* indicates statistically  
804 significant difference (p < 0.05).

805

806 Figure 6. Comparison of T-cell related transcription factor and cytokine mRNA levels in  
807 experimentally PUUV-infected voles. The spleens of mock (**A**, n = 2), PUUV-Suo (**B**, n = 4), and  
808 PUUV-wt (**C**, n = 3) infected voles were subjected to relative mRNA expression level analysis by  
809 RT-qPCR at indicated time points. Statistically significant differences were assessed separately for  
810 each gene between mock- and PUUV-infected voles. \* (p < 0.05). Bars represent mean +/- standard  
811 deviation.

812

813 Figure 7. Comparison of cytokine mRNA responses in bank vole splenocytes infected with PUUV-  
814 Suo and PUUV-Kazan isolates. Splenocytes were isolated from PUUV-negative bank voles and  
815 either infected with UV-inactivated or live PUUV isolates or not infected (n = 3 for PUUV-Suo; n  
816 = 2 for PUUV-Kazan; multiplicity of infection 0.01 for both). Quantification of mRNAs was  
817 conducted relative to non-infected splenocytes using RT-qPCR. \* (p < 0.05) or \*\* (p < 0.01). Bars  
818 represent mean +/- standard deviation.

819

820



821 Table 1. Comparison between the consensus nucleotide sequences and amino acid sequences of the  
 822 PUUV-Suo strain at the pre-isolation stage in the lungs of a naturally infected bank vole and after  
 823 isolation in Mygla.REC.B cells.

824  
 825

| Segment | Nucleotide position in anti-genomic orientation | Nucleotide in original virus | Nucleotide in isolate | Amino acid in original virus | Amino acid in isolate | Codon position |
|---------|-------------------------------------------------|------------------------------|-----------------------|------------------------------|-----------------------|----------------|
| L       | 66                                              | A                            | G                     | no change                    |                       | 3rd            |
|         | 411                                             | G                            | A                     | Methionine                   | Isoleucine            | 3rd            |
|         | 5700                                            | A                            | G                     | Isoleucine                   | Methionine            | 3rd            |
|         | 5942                                            | C                            | U                     | Alanine                      | Valine                | 2nd            |
| M       | 89                                              | U                            | C                     | no change                    |                       | 1st            |
|         | 3544                                            | U                            | C                     |                              |                       | non-coding     |
| S       | 136                                             | G                            | U                     | Valine                       | Leucine               | 1st            |
|         | 1625                                            | C                            | U                     |                              |                       | non-coding     |

826  
 827  
 828  
 829  
 830  
 831  
 832

**DNA**                      **PUUN**                      **Overlay**

**Mock**

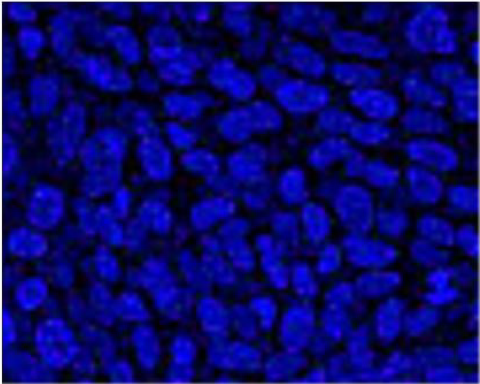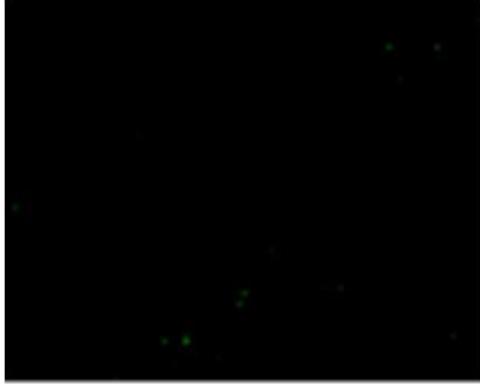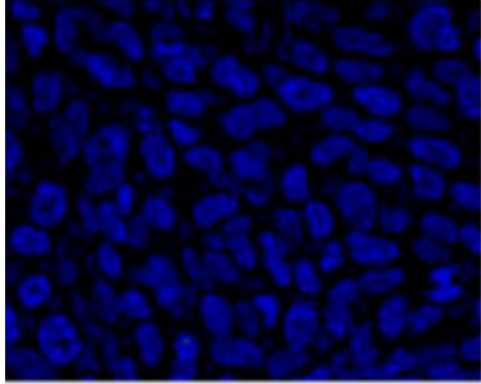

**PUUV-Suo**

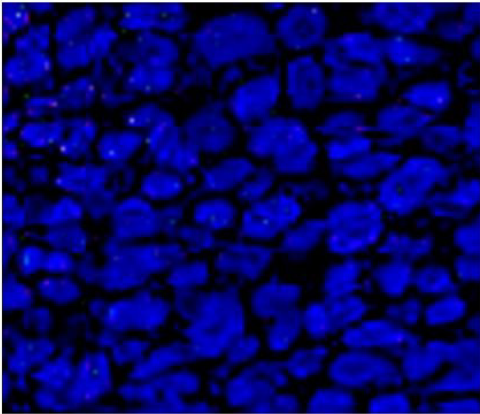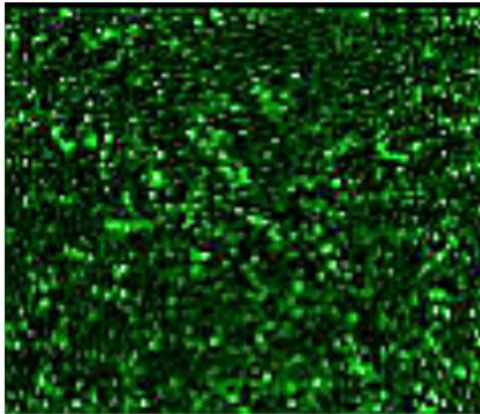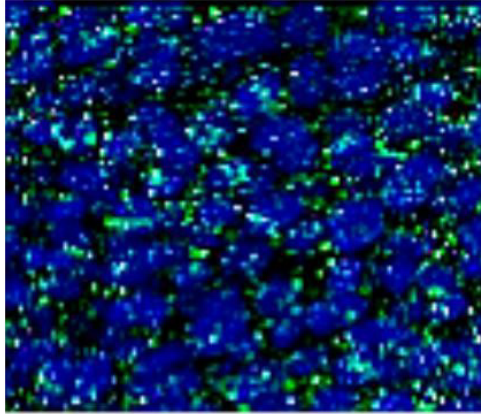

**A**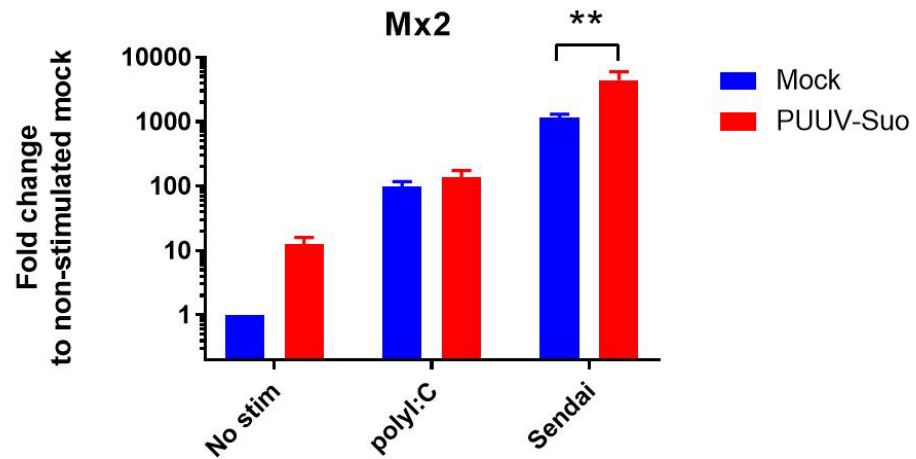**B**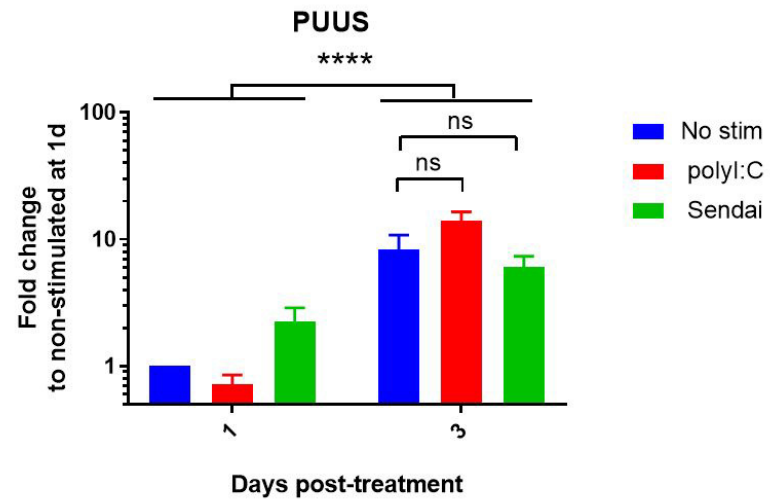

**A**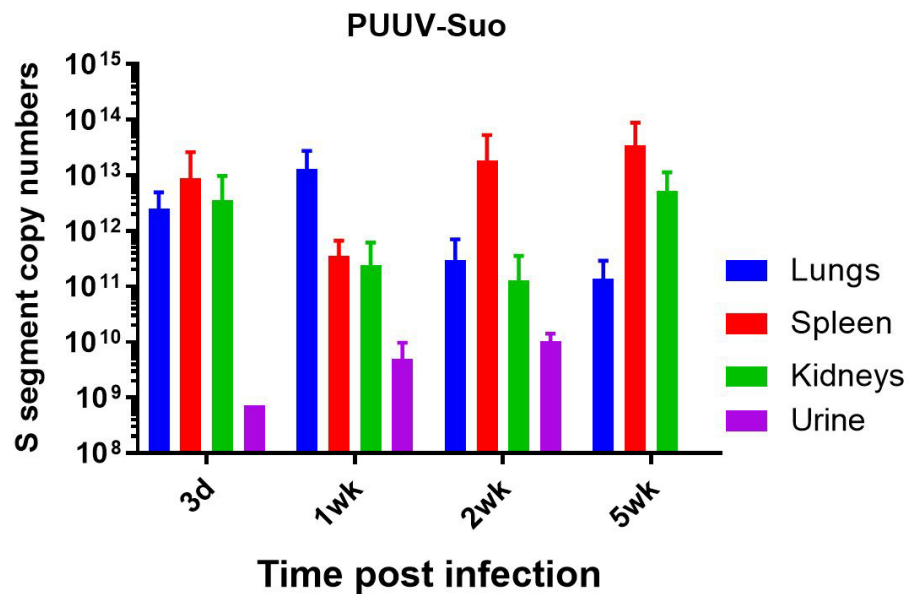**B**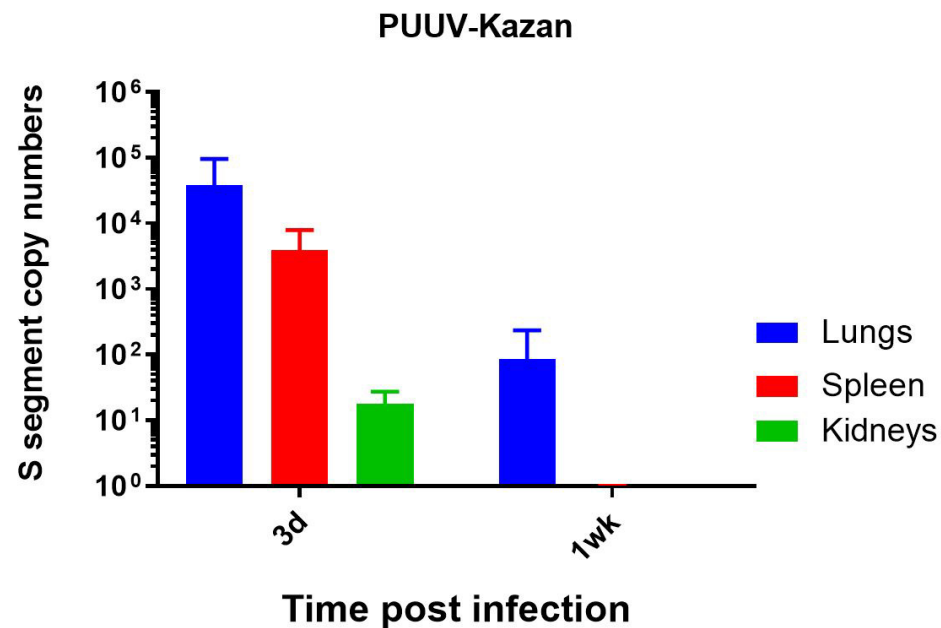**C**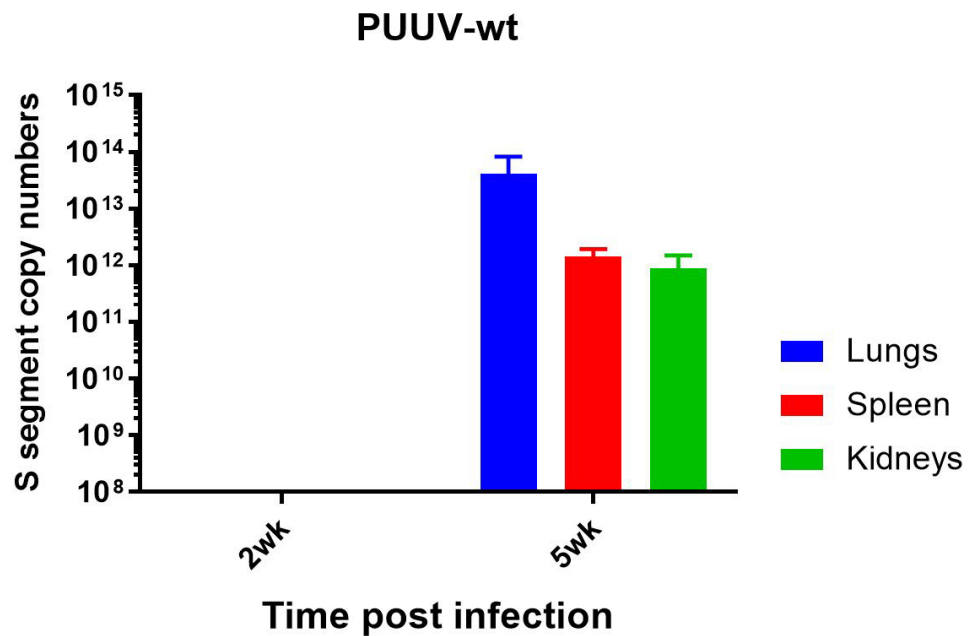**D**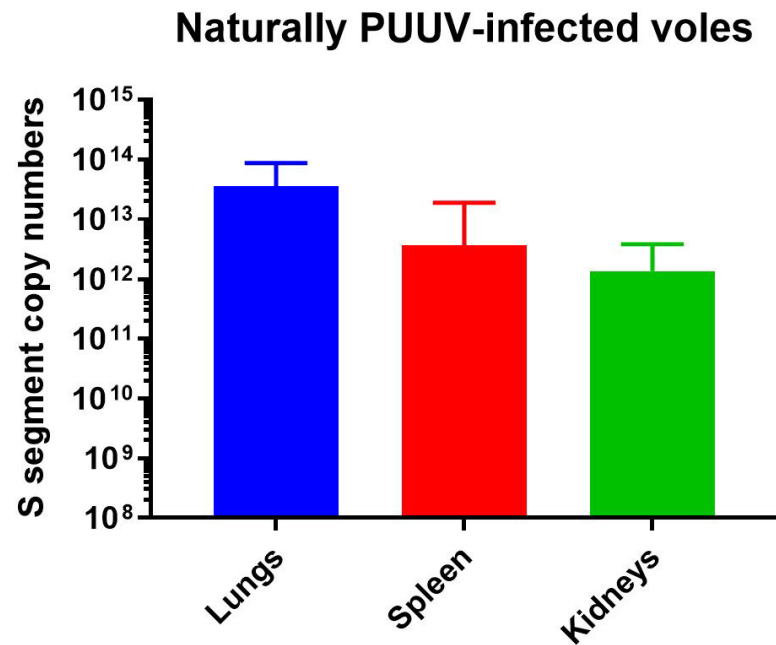

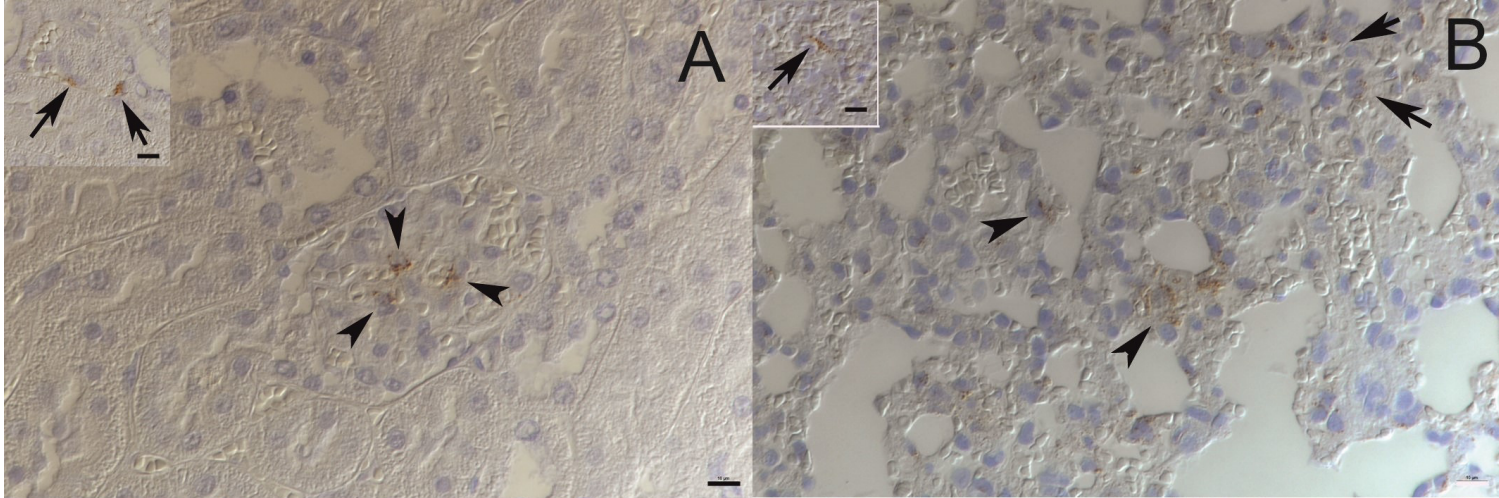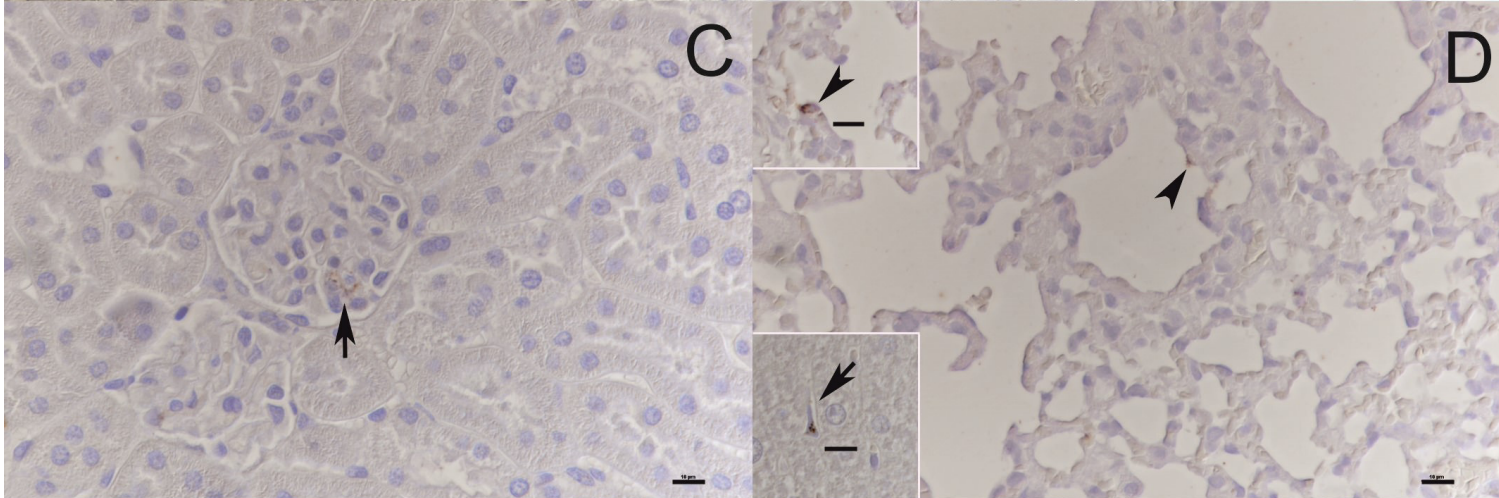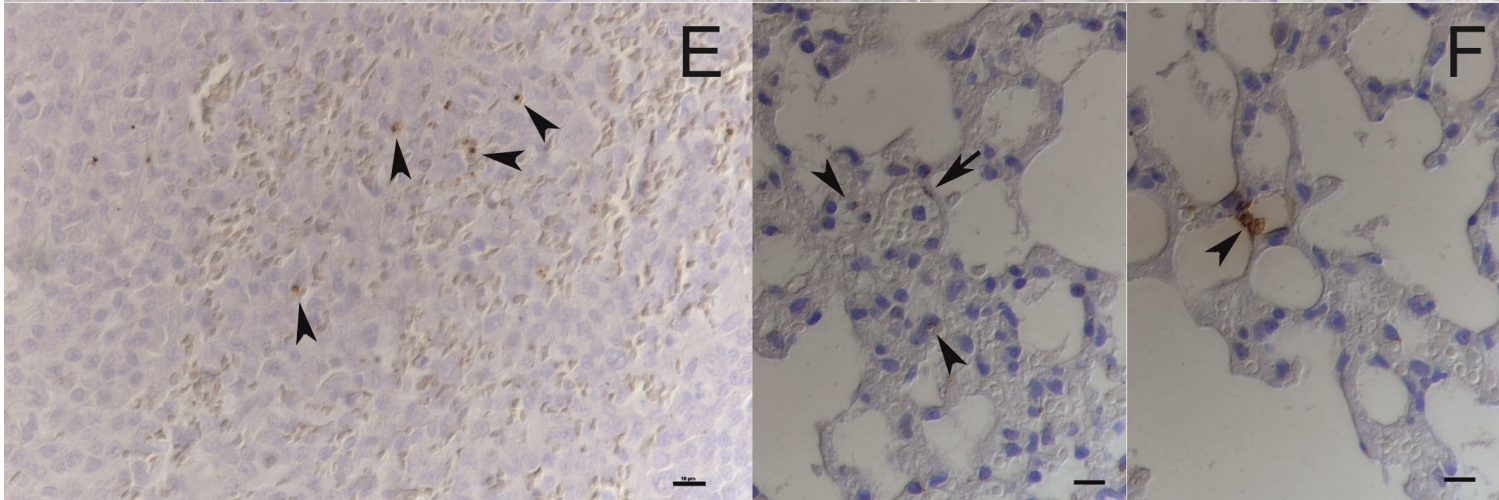

**A**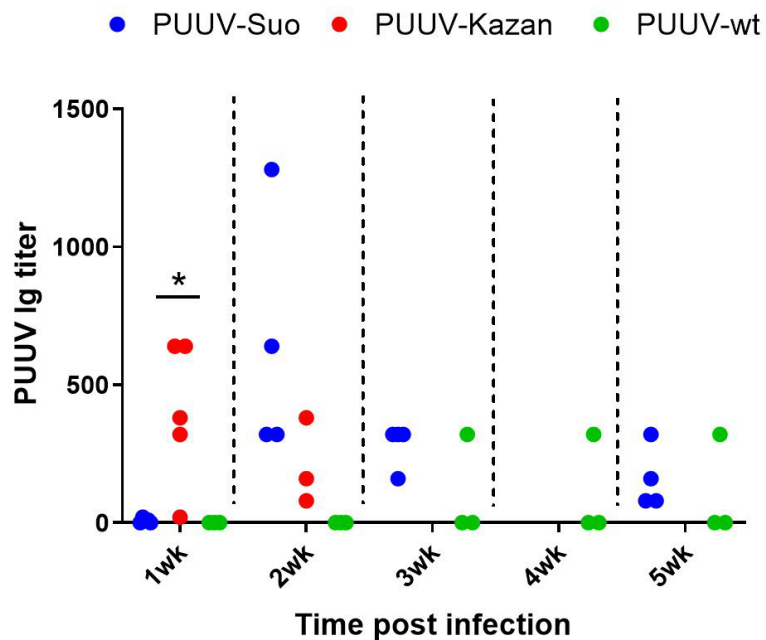**B**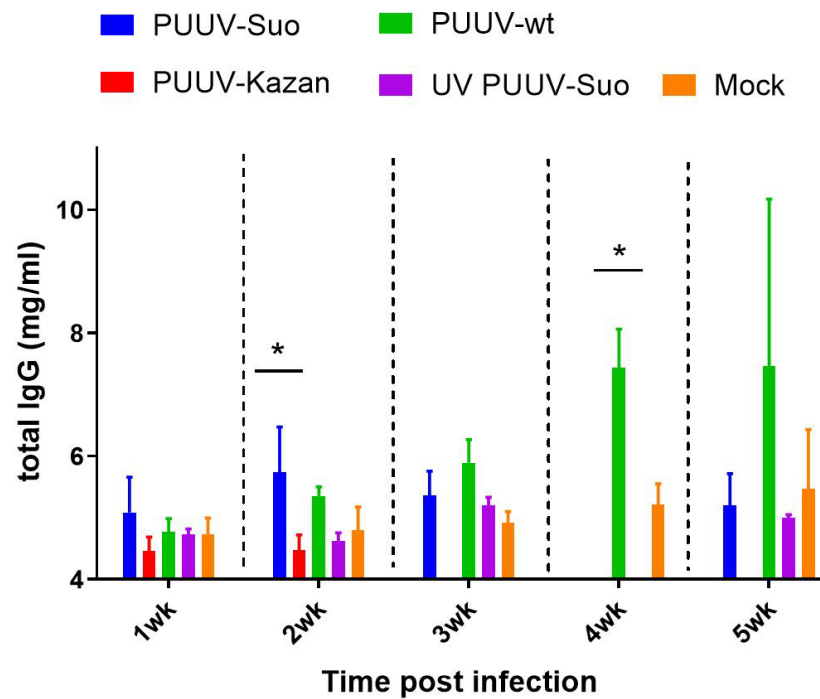**C**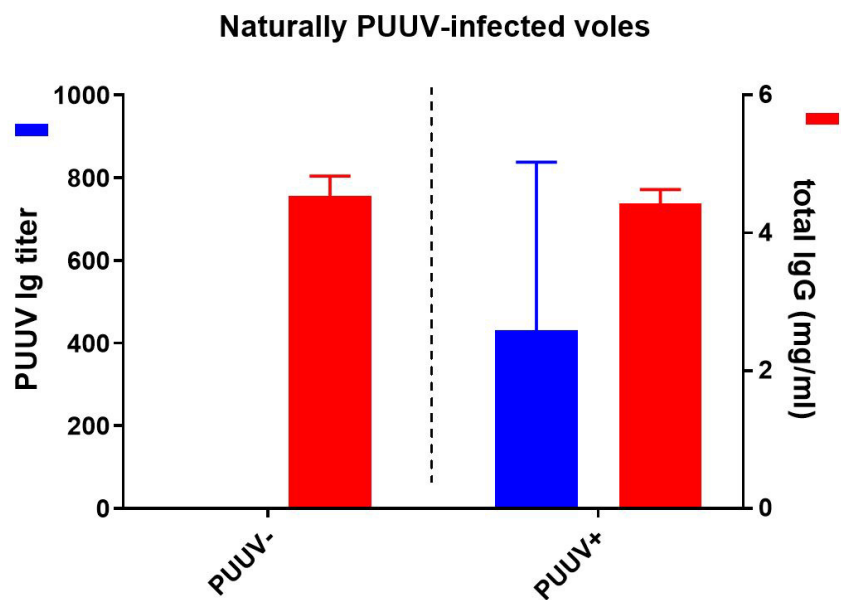

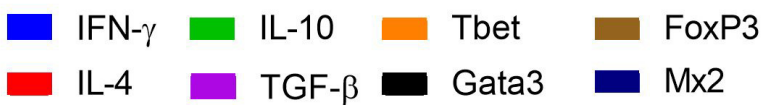

**A**

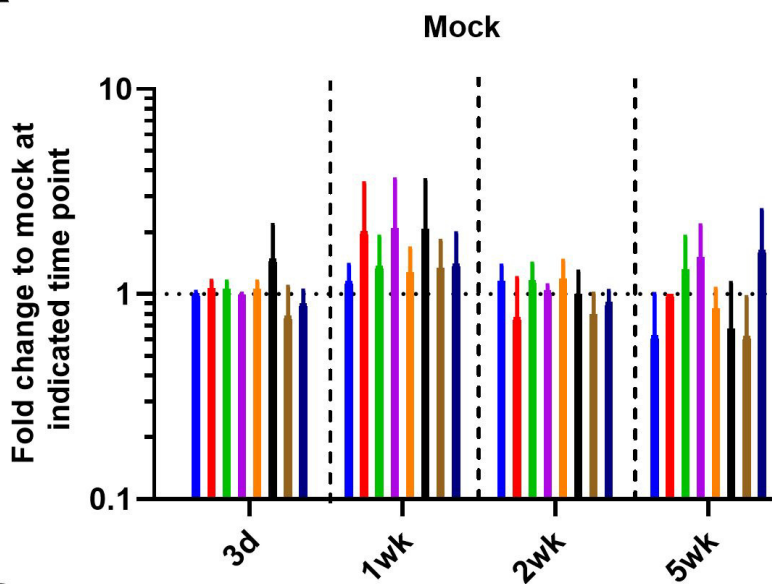

**B**

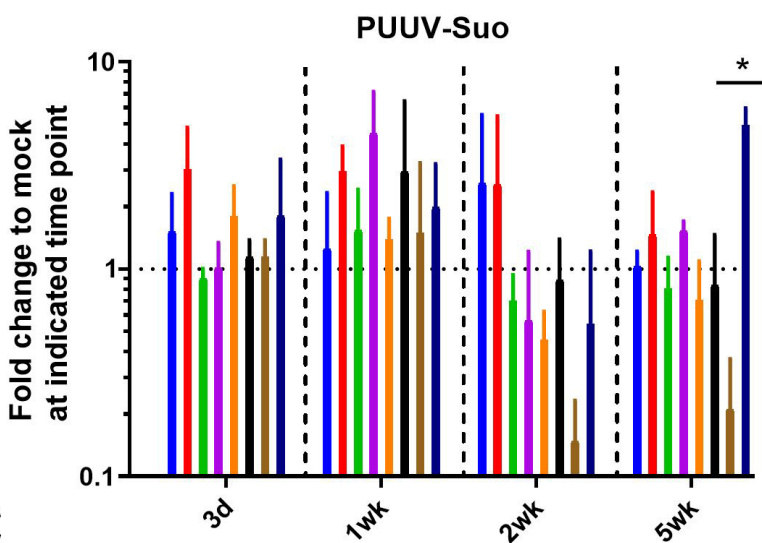

**C**

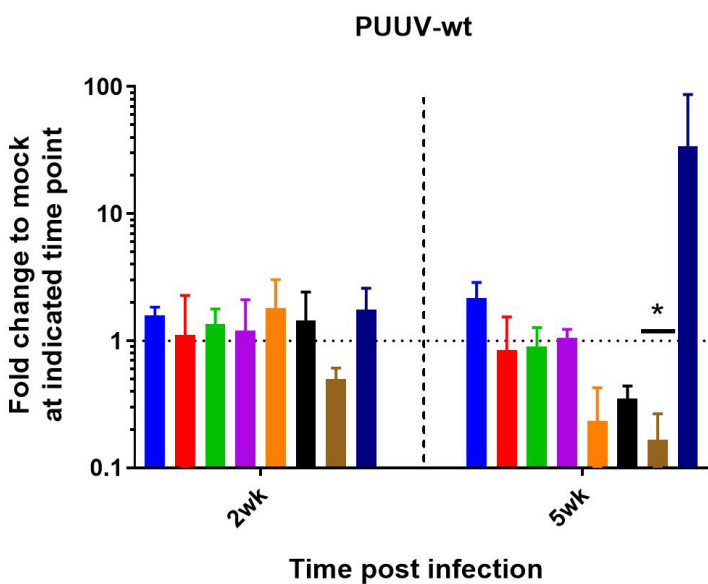

Fold change mRNA levels  
to mock control

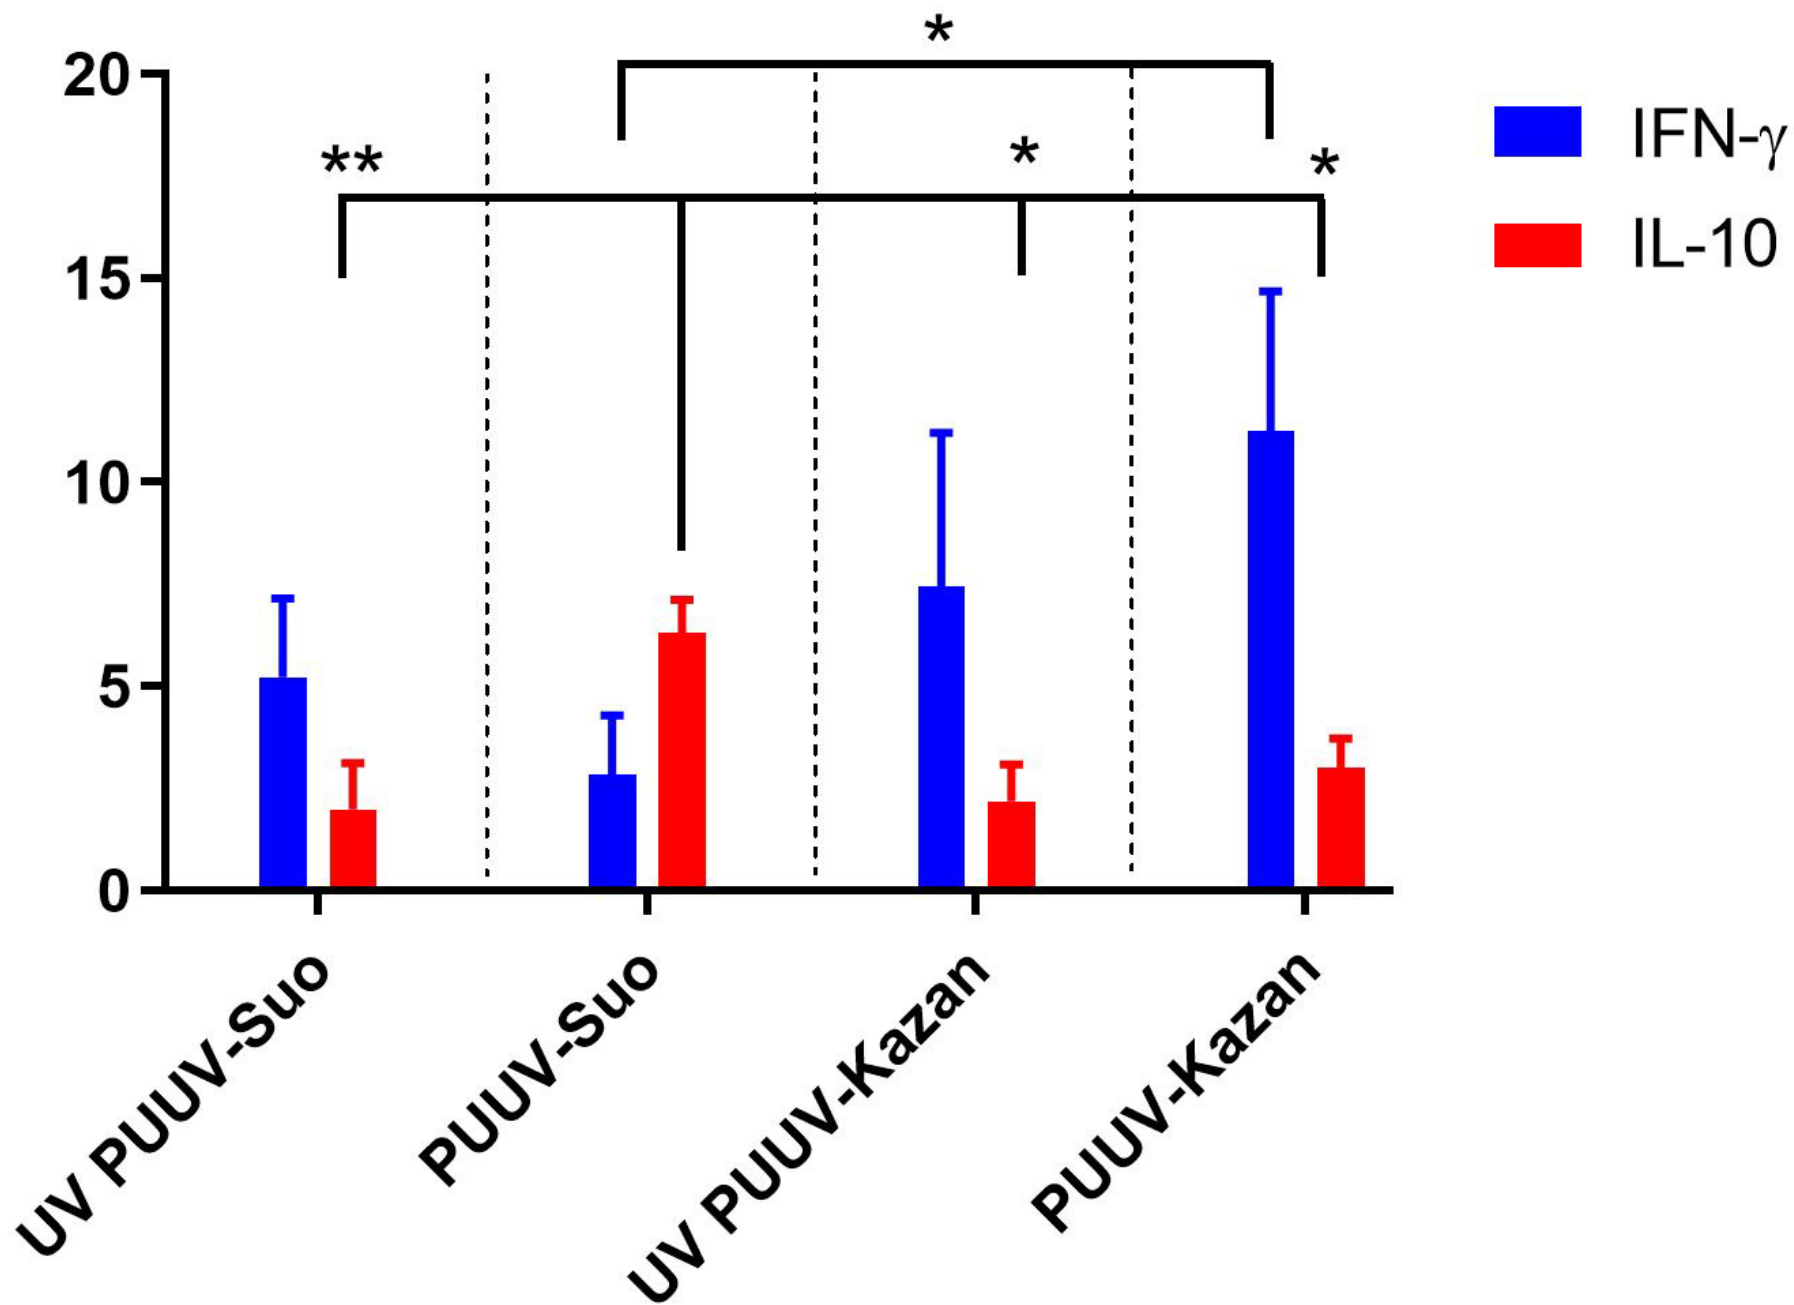

Source: https://www.biorxiv.org/content/10.1101/831214v1.full.pdf
